# Supplementary material for: Amphiphilic chiral block-poly(thiophene)s: tuning the blocks
Source: Royal Society of Chemistry journal article supplement (doi:10.1039/c3py00133d), 2013-01-01

## Electronic Supplementary Information (ESI)

# Amphiphilic chiral block-poly(thiophene)s: Tuning the blocks.

Michiel Verswyvel, Karel Goossens and Guy Koeckelberghs.

### Table of contents:

|           |                                                                                                                                            |    |
|-----------|--------------------------------------------------------------------------------------------------------------------------------------------|----|
| <b>A.</b> | <b><sup>1</sup>H and <sup>13</sup>C NMR spectra</b>                                                                                        | 3  |
|           | Figure S1: <sup>1</sup> H NMR spectrum of <b>2</b>                                                                                         | 3  |
|           | Figure S2: <sup>13</sup> C NMR spectrum of <b>2</b>                                                                                        | 4  |
|           | Figure S3: <sup>1</sup> H NMR spectrum of <b>3</b>                                                                                         | 5  |
|           | Figure S4: <sup>13</sup> C NMR spectrum of <b>3</b>                                                                                        | 6  |
|           | Figure S5: <sup>1</sup> H NMR spectrum of <b>4</b>                                                                                         | 7  |
|           | Figure S6: <sup>13</sup> C NMR spectrum of <b>4</b>                                                                                        | 8  |
|           | Figure S7: <sup>1</sup> H NMR spectrum of <b>P2</b>                                                                                        | 9  |
|           | Figure S8: <sup>1</sup> H NMR spectrum of <b>P4</b>                                                                                        | 10 |
|           | Figure S9: <sup>1</sup> H NMR spectrum of <b>P5</b>                                                                                        | 11 |
|           | Figure S10: <sup>1</sup> H NMR spectrum of <b>P6</b>                                                                                       | 12 |
| <b>B.</b> | <b>UV-vis &amp; CD spectroscopy</b>                                                                                                        | 13 |
| 1.        | In solution                                                                                                                                | 13 |
| i.        | Neutral media                                                                                                                              | 13 |
|           | Figure S11: UV-vis, CD and g <sub>abs</sub> spectra for the solvatochromism experiments of <b>P2</b> in a neutral THF/MeOH mixture.        | 13 |
|           | Figure S12: UV-vis, CD and g <sub>abs</sub> spectra for the addition of acid to <b>P2</b> in a neutral THF/MeOH mixture of THF/MeOH 40/60. | 14 |
|           | Figure S13: g <sub>abs</sub> spectra of <b>P3</b> in a neutral THF/MeOH mixture.                                                           | 15 |
|           | Figure S14: UV-vis, CD and g <sub>abs</sub> spectra for the addition of acid to <b>P4</b> in a neutral THF/MeOH mixture of THF/MeOH 40/60. | 16 |
|           | Figure S15: UV-vis, CD and g <sub>abs</sub> spectra for the addition of acid to <b>P4</b> in neutral THF/MeOH 40/60 mixture.               | 17 |
|           | Figure S16: UV-vis, CD and g <sub>abs</sub> spectra for the solvatochromism experiments of <b>P5</b> in a neutral THF/MeOH mixture.        | 18 |
|           | Figure S17: UV-vis, CD and g <sub>abs</sub> spectra for the addition of acid to <b>P5</b> in a neutral THF/MeOH 20/80 mixture.             | 19 |
|           | Figure S18: UV-vis, CD and g <sub>abs</sub> spectra for the solvatochromism experiments of <b>P6</b> in a neutral THF/MeOH mixture.        | 20 |
|           | Figure S19: UV-vis, CD and g <sub>abs</sub> spectra for the addition of acid to <b>P6</b> in a neutral THF/MeOH 20/80 mixture.             | 21 |
| ii.       | Acidic media                                                                                                                               | 22 |
|           | Figure S20: UV-vis, CD and g <sub>abs</sub> spectra for the solvatochromism experiments of <b>P2</b> in an acidic THF/MeOH mixture.        | 22 |
|           | Figure S21: UV-vis, CD and g <sub>abs</sub> spectra for the addition of base to <b>P2</b> in an acidic THF/MeOH 40/60 mixture.             | 23 |
|           | Figure S22: UV-vis, CD and g <sub>abs</sub> spectra for the solvatochromism experiments of <b>P4</b> in an acidic THF/MeOH mixture.        | 24 |
|           | Figure S23: UV-vis, CD and g <sub>abs</sub> spectra for the addition of base to <b>P4</b> in an acidic THF/MeOH 40/60 mixture.             | 25 |
|           | Figure S24: UV-vis, CD and g <sub>abs</sub> spectra for the solvatochromism experiments of <b>P5</b> in an acidic THF/MeOH mixture.        | 26 |
|           | Figure S25: UV-vis, CD and g <sub>abs</sub> spectra for the addition of base to <b>P5</b> in an acidic THF/MeOH 20/80 mixture.             | 27 |
|           | Figure S26: UV-vis, CD and g <sub>abs</sub> spectra for the solvatochromism experiments of <b>P6</b> in an acidic THF/MeOH mixture.        | 28 |
|           | Figure S27: UV-vis, CD and g <sub>abs</sub> spectra for the addition of base to <b>P6</b> in an acidic THF/MeOH 20/80 mixture.             | 29 |
| 2.        | In film                                                                                                                                    | 30 |
| i.        | Spincoated from neutral media                                                                                                              | 30 |
|           | Figure S28: UV-vis, CD and g <sub>abs</sub> spectra for the annealing experiments with <b>P2</b> with fast cooling.                        | 30 |
|           | Figure S29: UV-vis, CD and g <sub>abs</sub> spectra for the annealing experiments with <b>P2</b> with slow cooling.                        | 31 |

|                                                                                                                                                     |    |
|-----------------------------------------------------------------------------------------------------------------------------------------------------|----|
| Figure S30: UV-vis, CD and $g_{\text{abs}}$ spectra for the annealing experiments with <b>P3</b> with fast cooling.....                             | 32 |
| Figure S31: UV-vis, CD and $g_{\text{abs}}$ spectra for the annealing experiments with <b>P4</b> with fast cooling.....                             | 33 |
| Figure S32: UV-vis, CD and $g_{\text{abs}}$ spectra for the annealing experiments with <b>P4</b> with slow cooling.....                             | 34 |
| Figure S33: UV-vis, CD and $g_{\text{abs}}$ spectra for the annealing experiments with <b>P5</b> with fast cooling.....                             | 35 |
| Figure S34: UV-vis, CD and $g_{\text{abs}}$ spectra for the annealing experiments with <b>P6</b> with fast cooling.....                             | 36 |
| Figure S35: UV-vis, CD and $g_{\text{abs}}$ spectra for the annealing experiments with <b>P6</b> with slow cooling.....                             | 37 |
| ii. Spincoated from acidic media.....                                                                                                               | 38 |
| Figure S36: UV-vis, CD and $g_{\text{abs}}$ spectra for the annealing experiments with <b>P2</b> with fast cooling.....                             | 38 |
| Figure S37: UV-vis, CD and $g_{\text{abs}}$ spectra for the annealing experiments with <b>P3</b> with fast cooling.....                             | 39 |
| Figure S38: UV-vis, CD and $g_{\text{abs}}$ spectra for the annealing experiments with <b>P4</b> with fast cooling.....                             | 40 |
| Figure S39: UV-vis, CD and $g_{\text{abs}}$ spectra for the annealing experiments with <b>P6</b> with fast cooling.....                             | 41 |
| Figure S40: UV-vis, CD and $g_{\text{abs}}$ spectra for the annealing experiments with <b>P6</b> with slow cooling.....                             | 42 |
| Figure S41: UV-vis, CD and $g_{\text{abs}}$ spectra for the spincoated films of <b>P6</b> with different film thicknesses.....                      | 43 |
| Figure S42: UV-vis, CD and $g_{\text{abs}}$ spectra for the annealing experiments with <b>P6</b> with different film thicknesses and fast cooling.. | 44 |
| Figure S43: UV-vis, CD and $g_{\text{abs}}$ spectra for the annealing experiments with <b>P6</b> with different film thicknesses and slow cooling.  | 45 |
| <b>C. Polarizing optical microscopy (POM)</b> .....                                                                                                 | 46 |
| Figure S44: POM picture of the <b>P6</b> polymer sample during slow cooling from 90 °C.....                                                         | 46 |
| <b>D. Differential scanning calorimetry (DSC) of polymers P1-P6</b> .....                                                                           | 47 |

A.  $^1\text{H}$  and  $^{13}\text{C}$  NMR spectra

Figure S1:  $^1\text{H}$  NMR spectrum of 2.

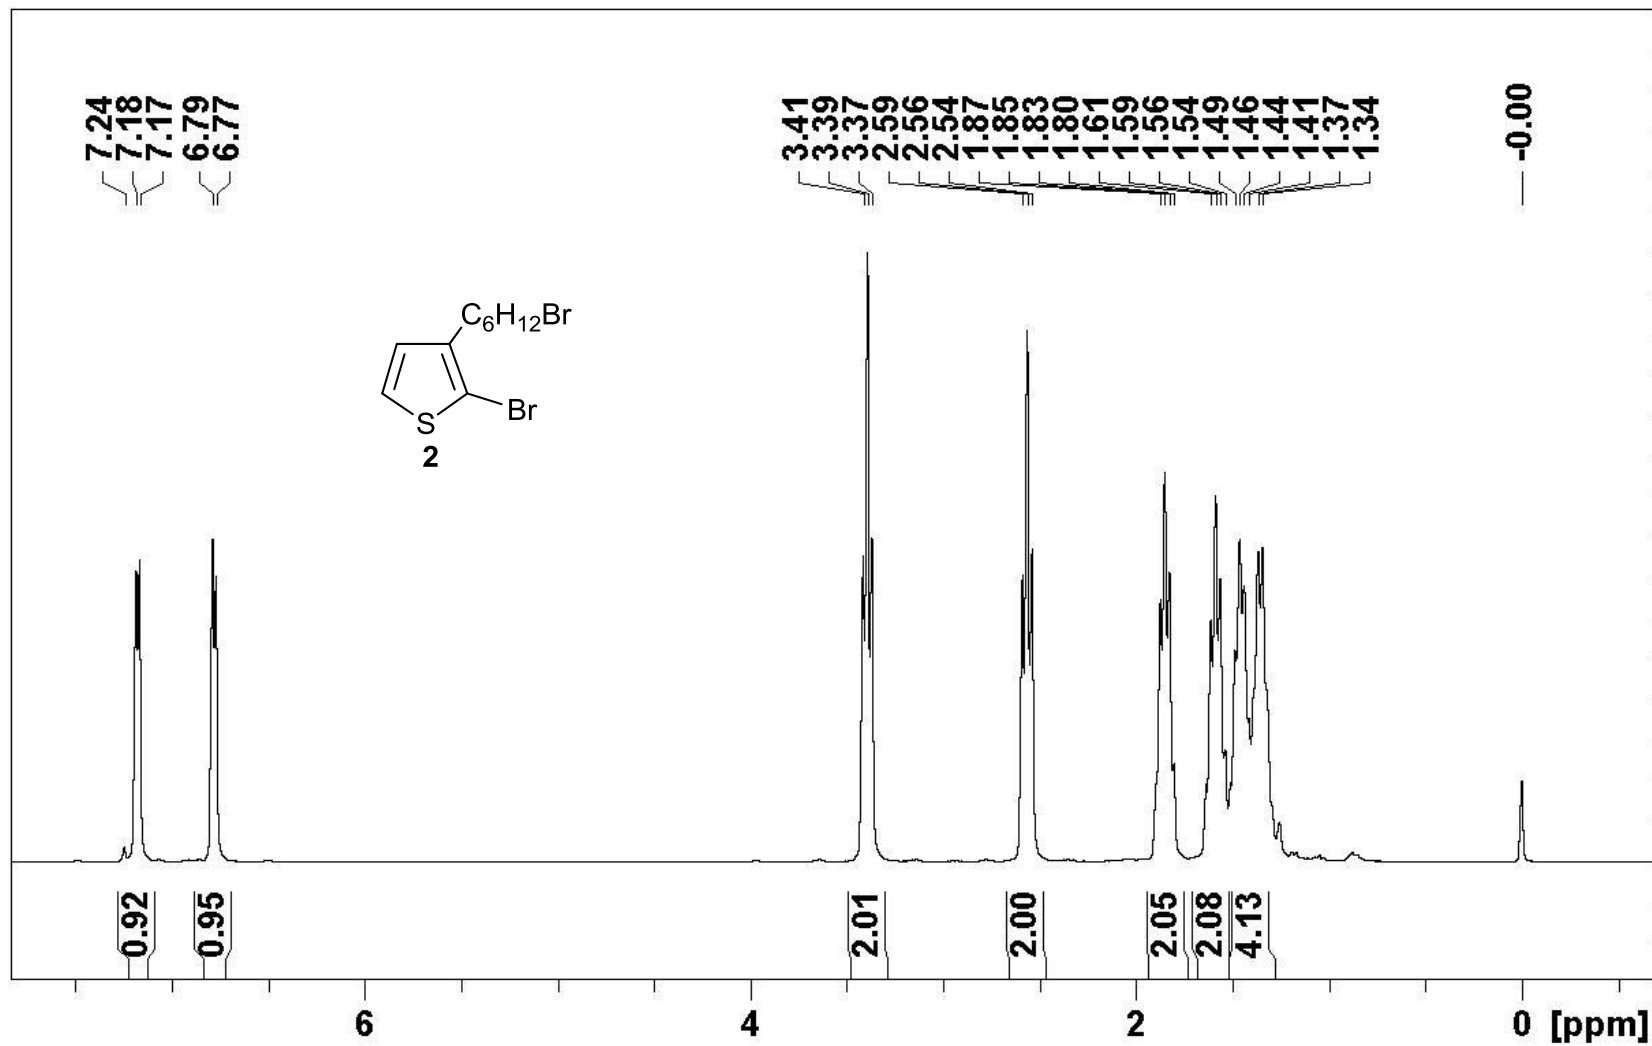

Figure S2:  $^{13}\text{C}$  NMR spectrum of 2.

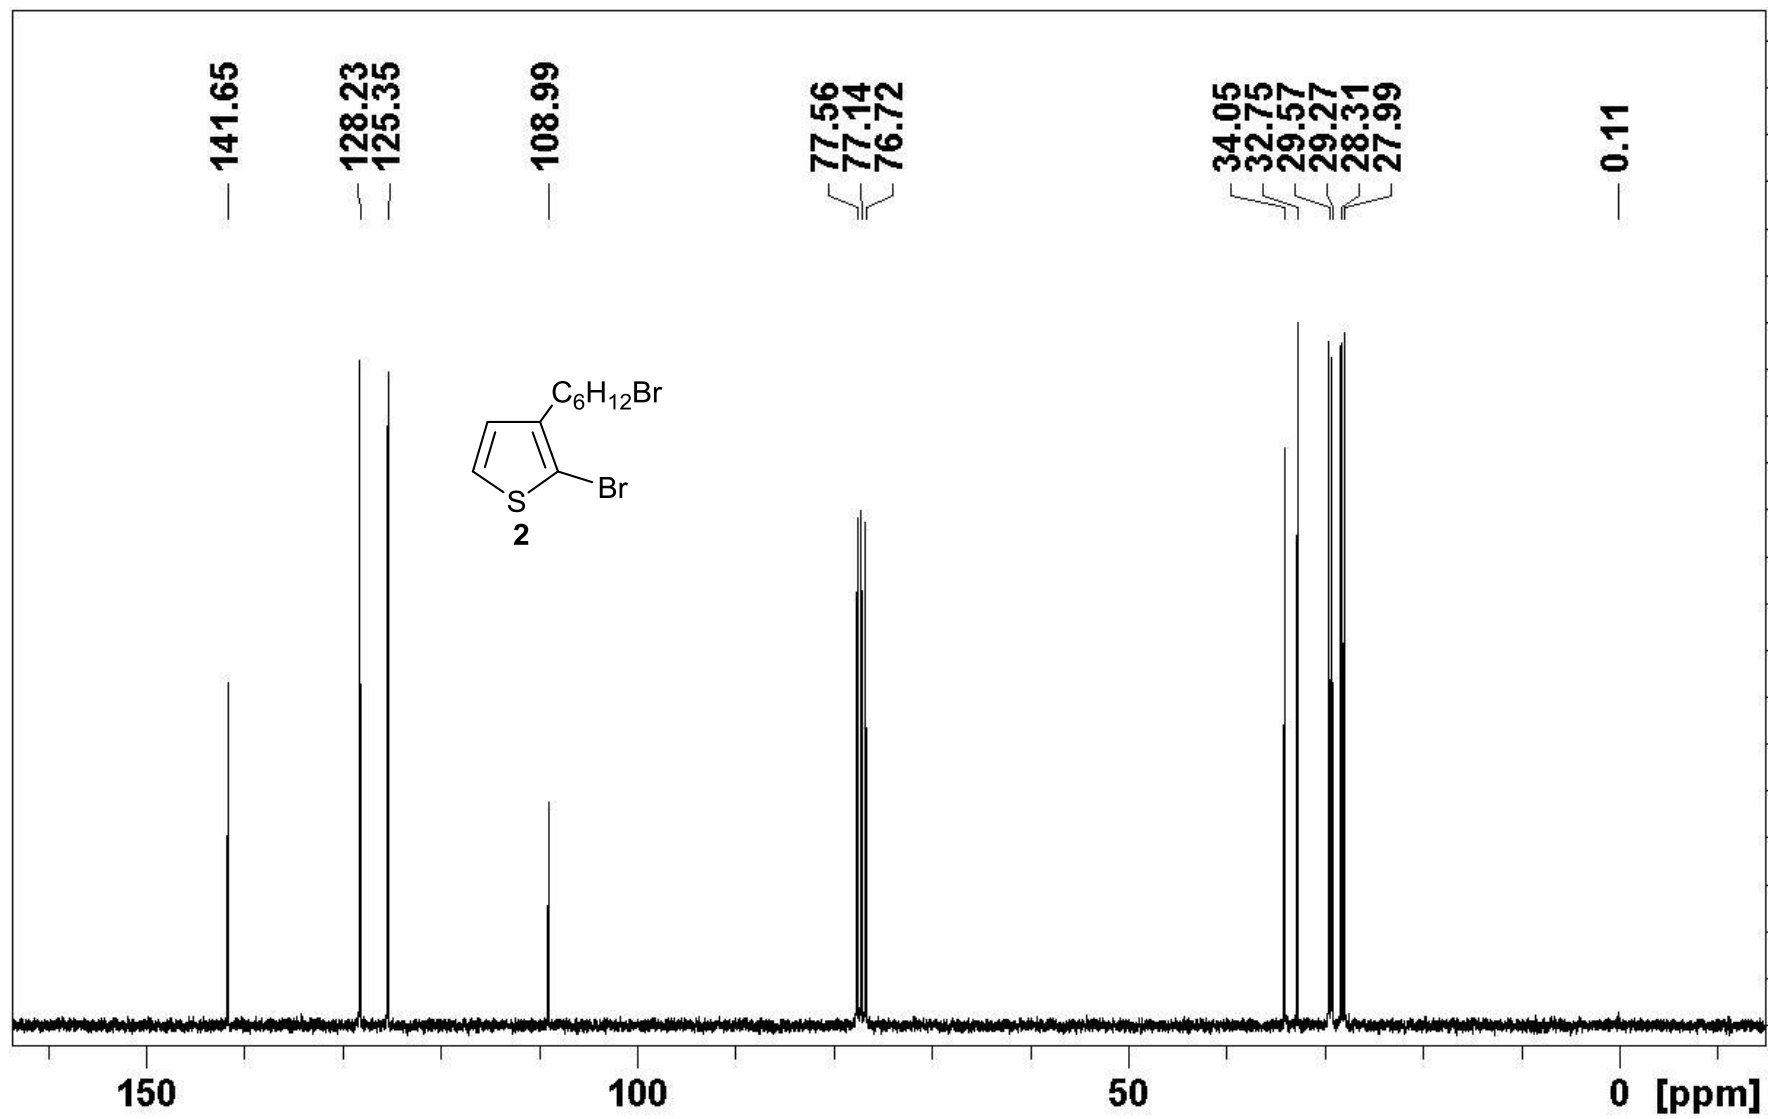

Figure S3:  $^1\text{H}$  NMR spectrum of 3.

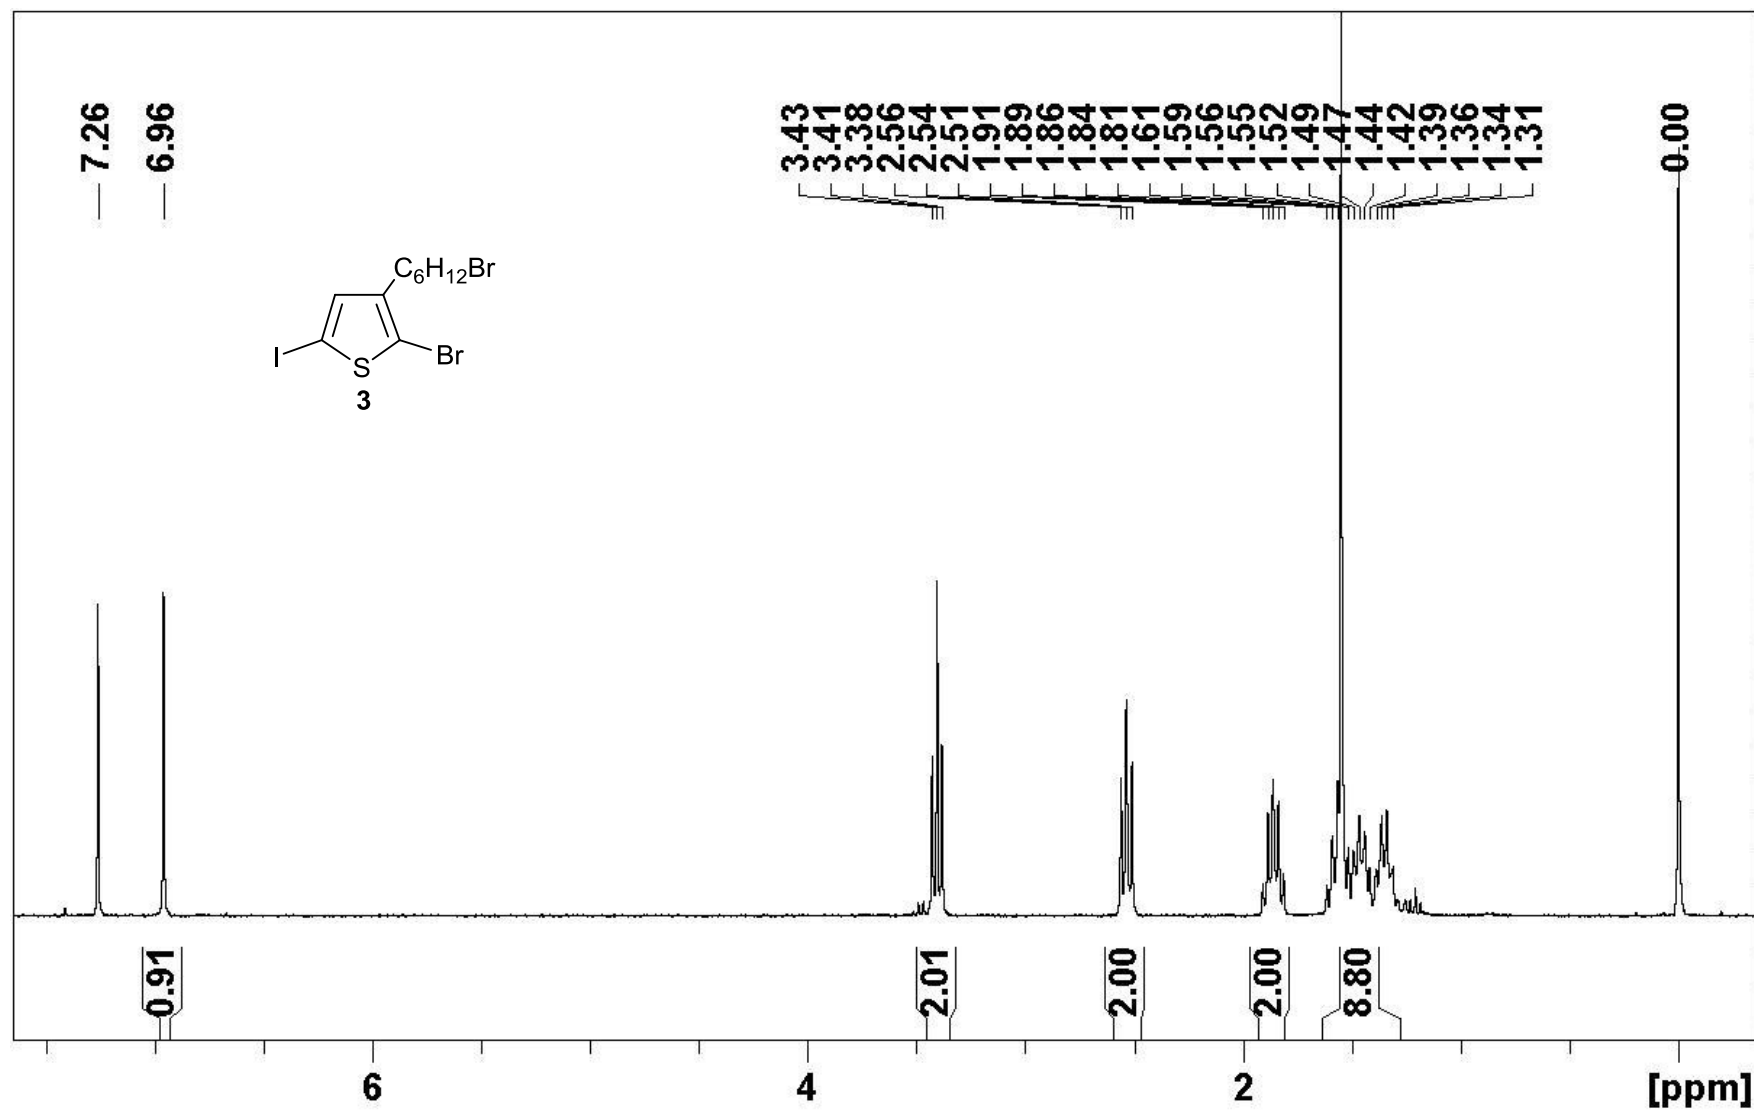

Figure S4:  $^{13}\text{C}$  NMR spectrum of 3.

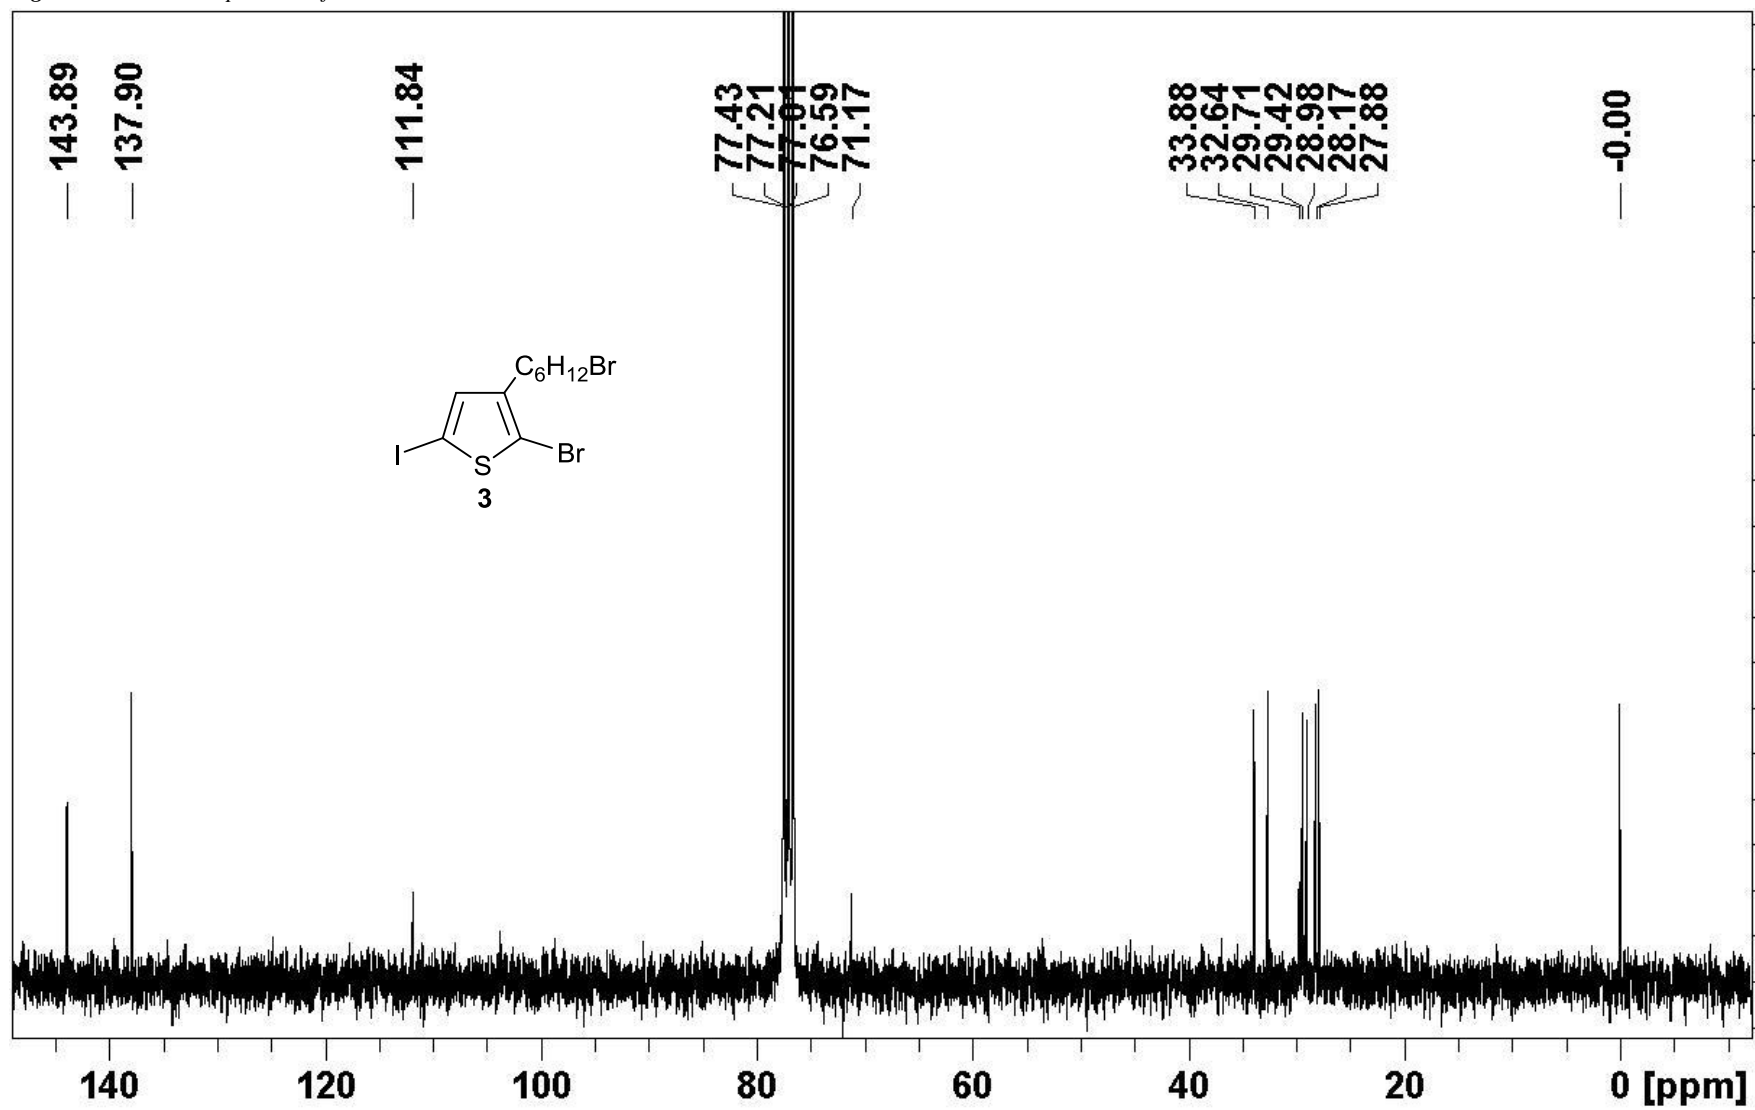

Figure S5:  $^1\text{H}$  NMR spectrum of 4.

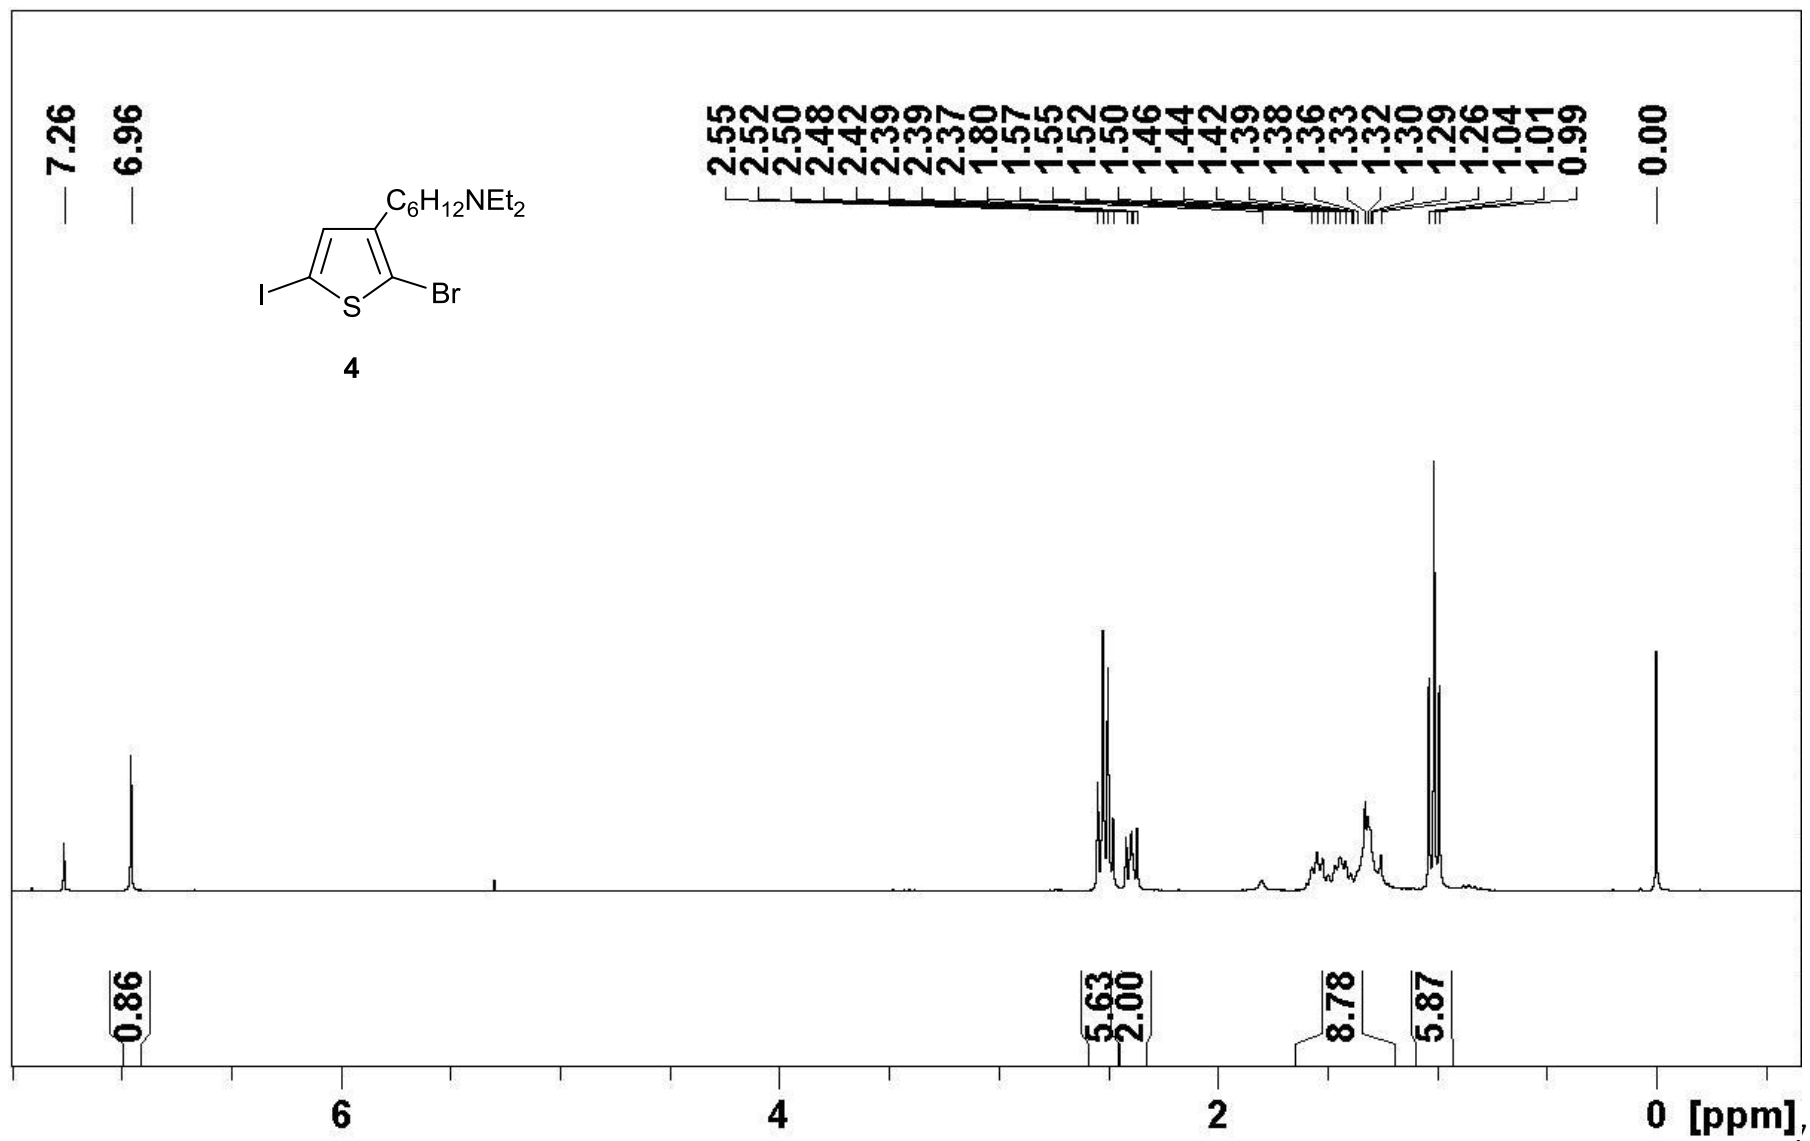

Figure S6:  $^{13}\text{C}$  NMR spectrum of **4**.

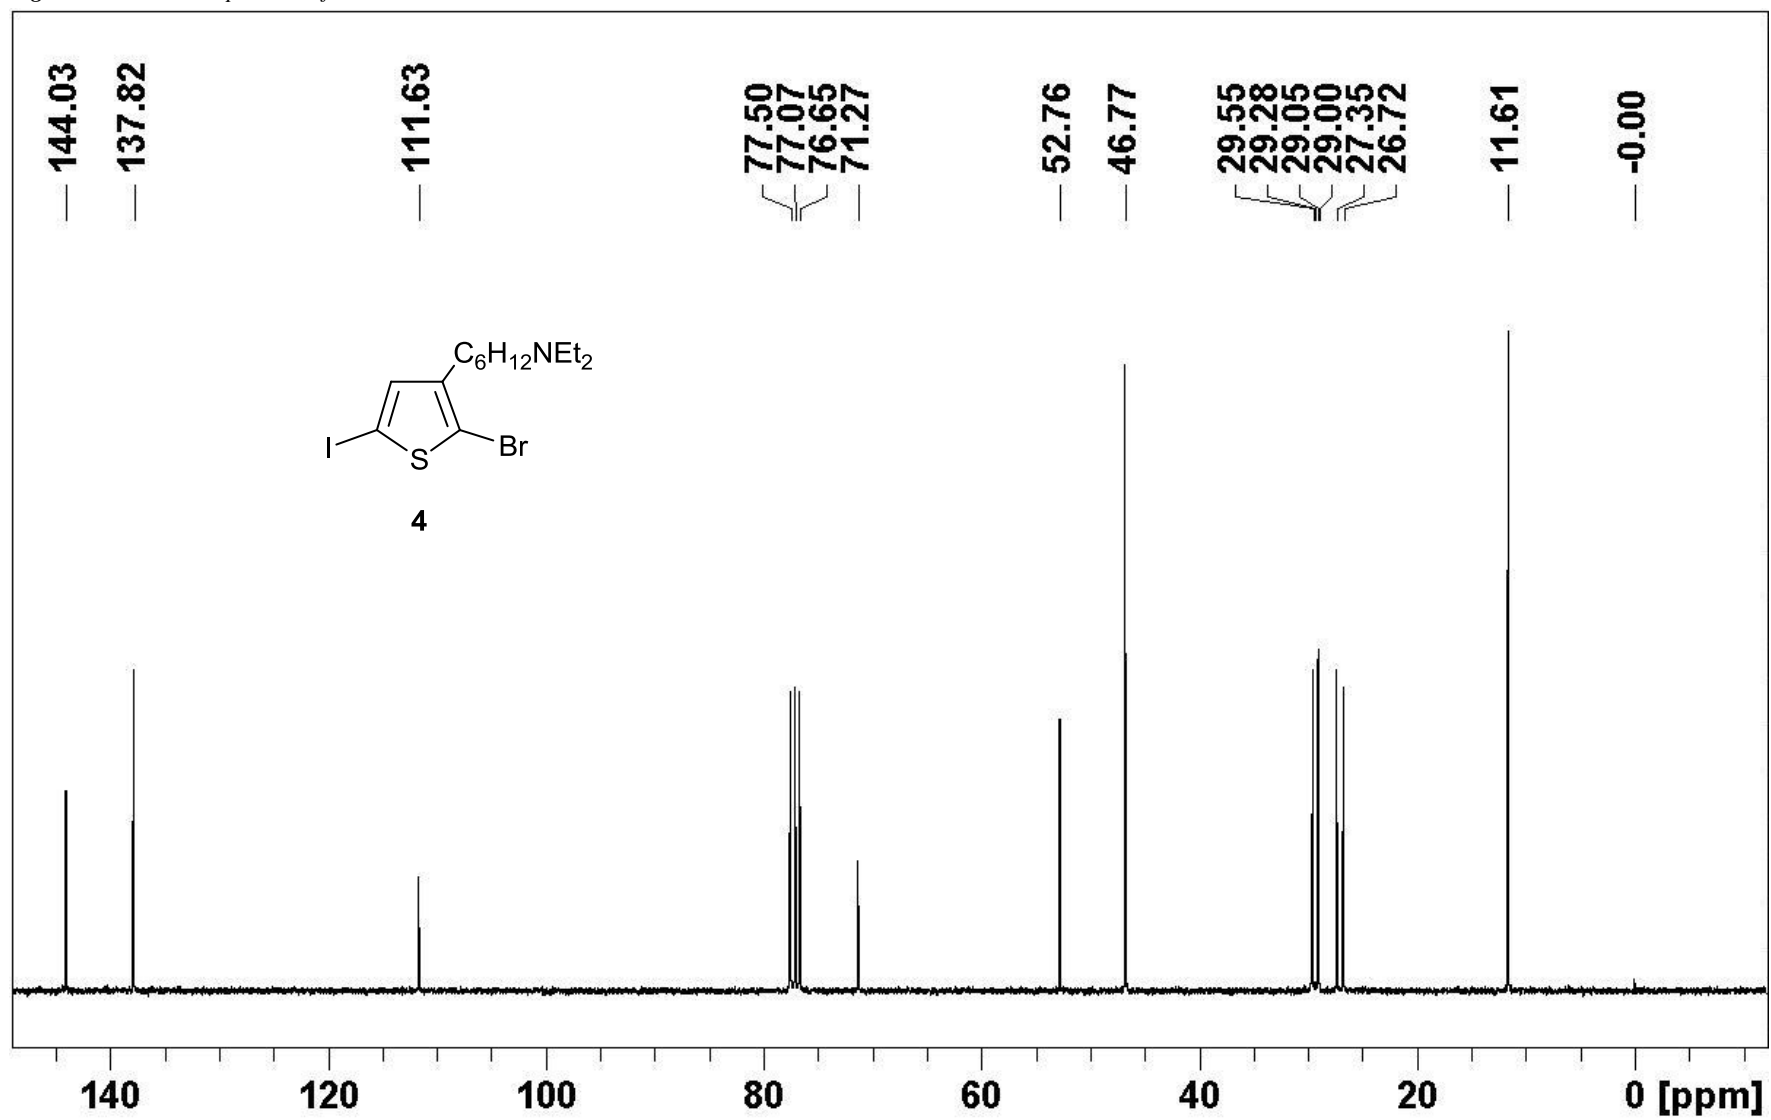



Figure S7:  $^1\text{H}$  NMR spectrum of P2.

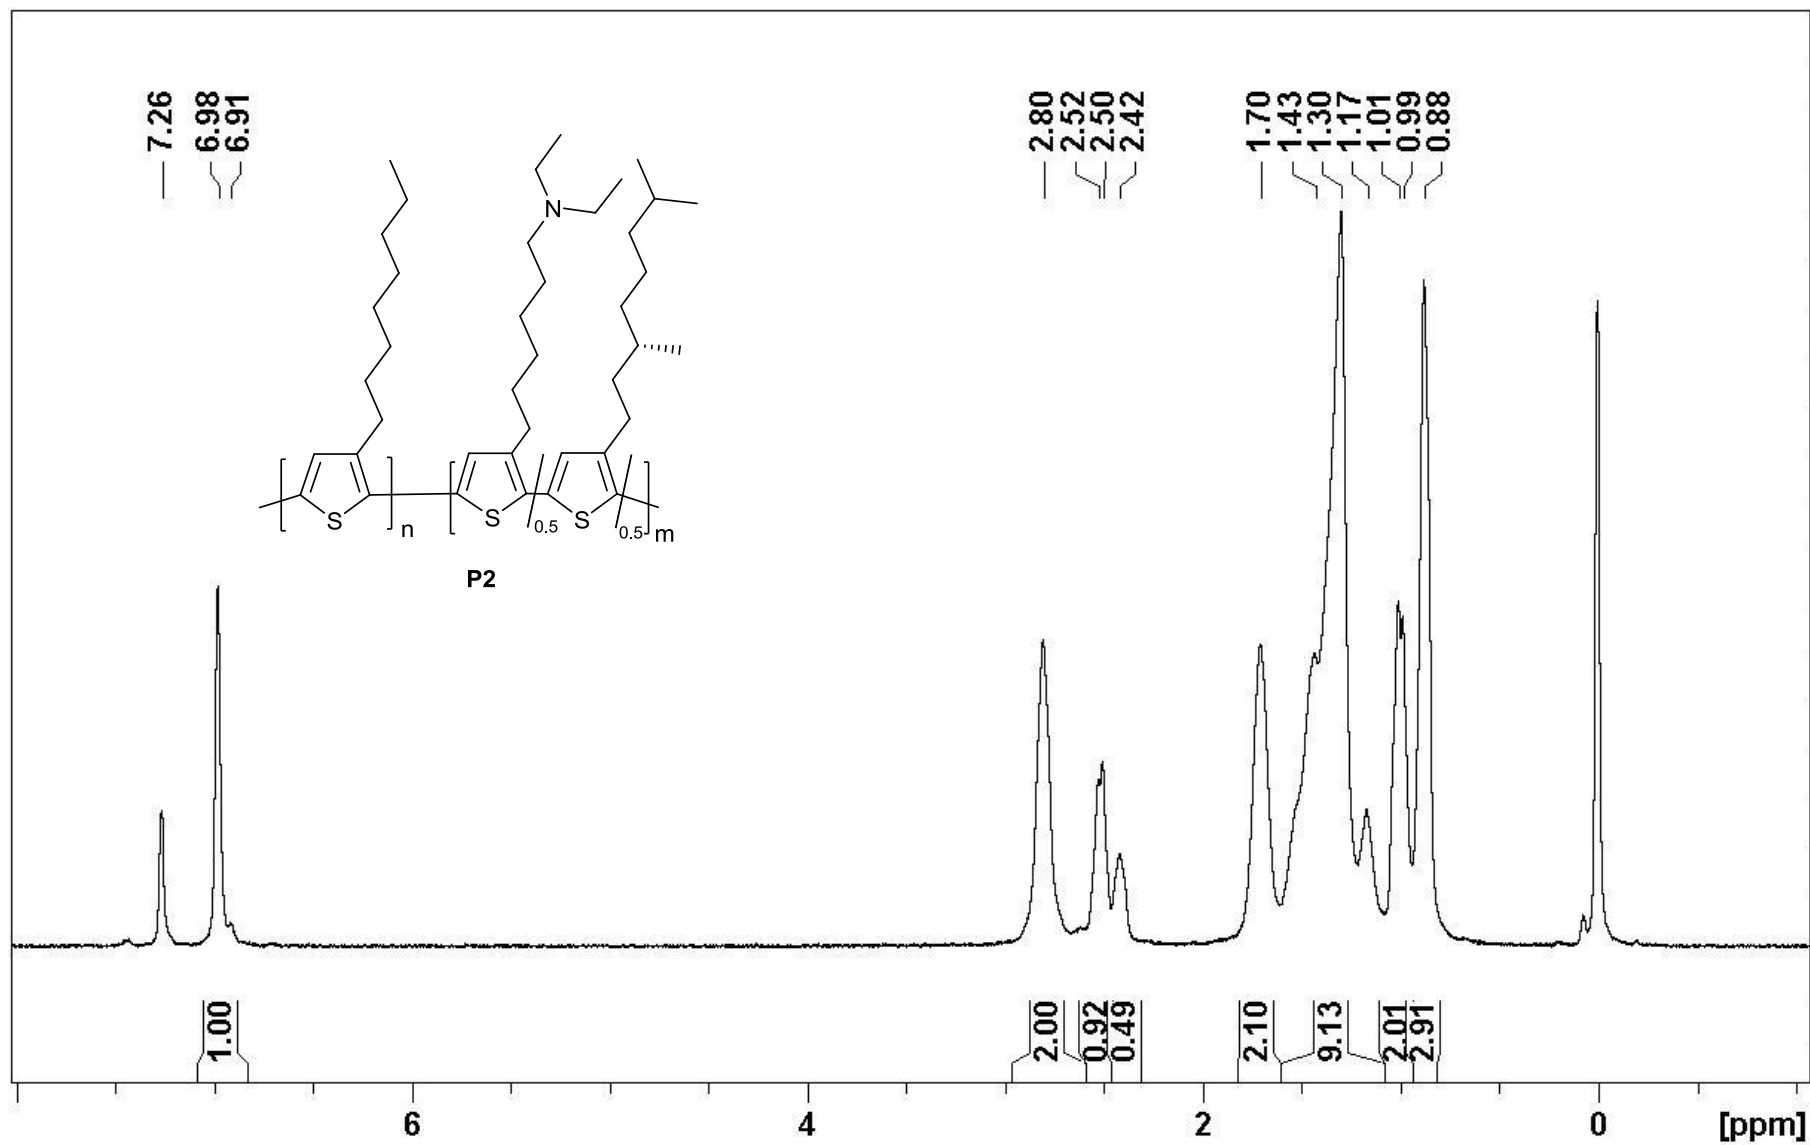

Figure S8:  $^1\text{H}$  NMR spectrum of P4.

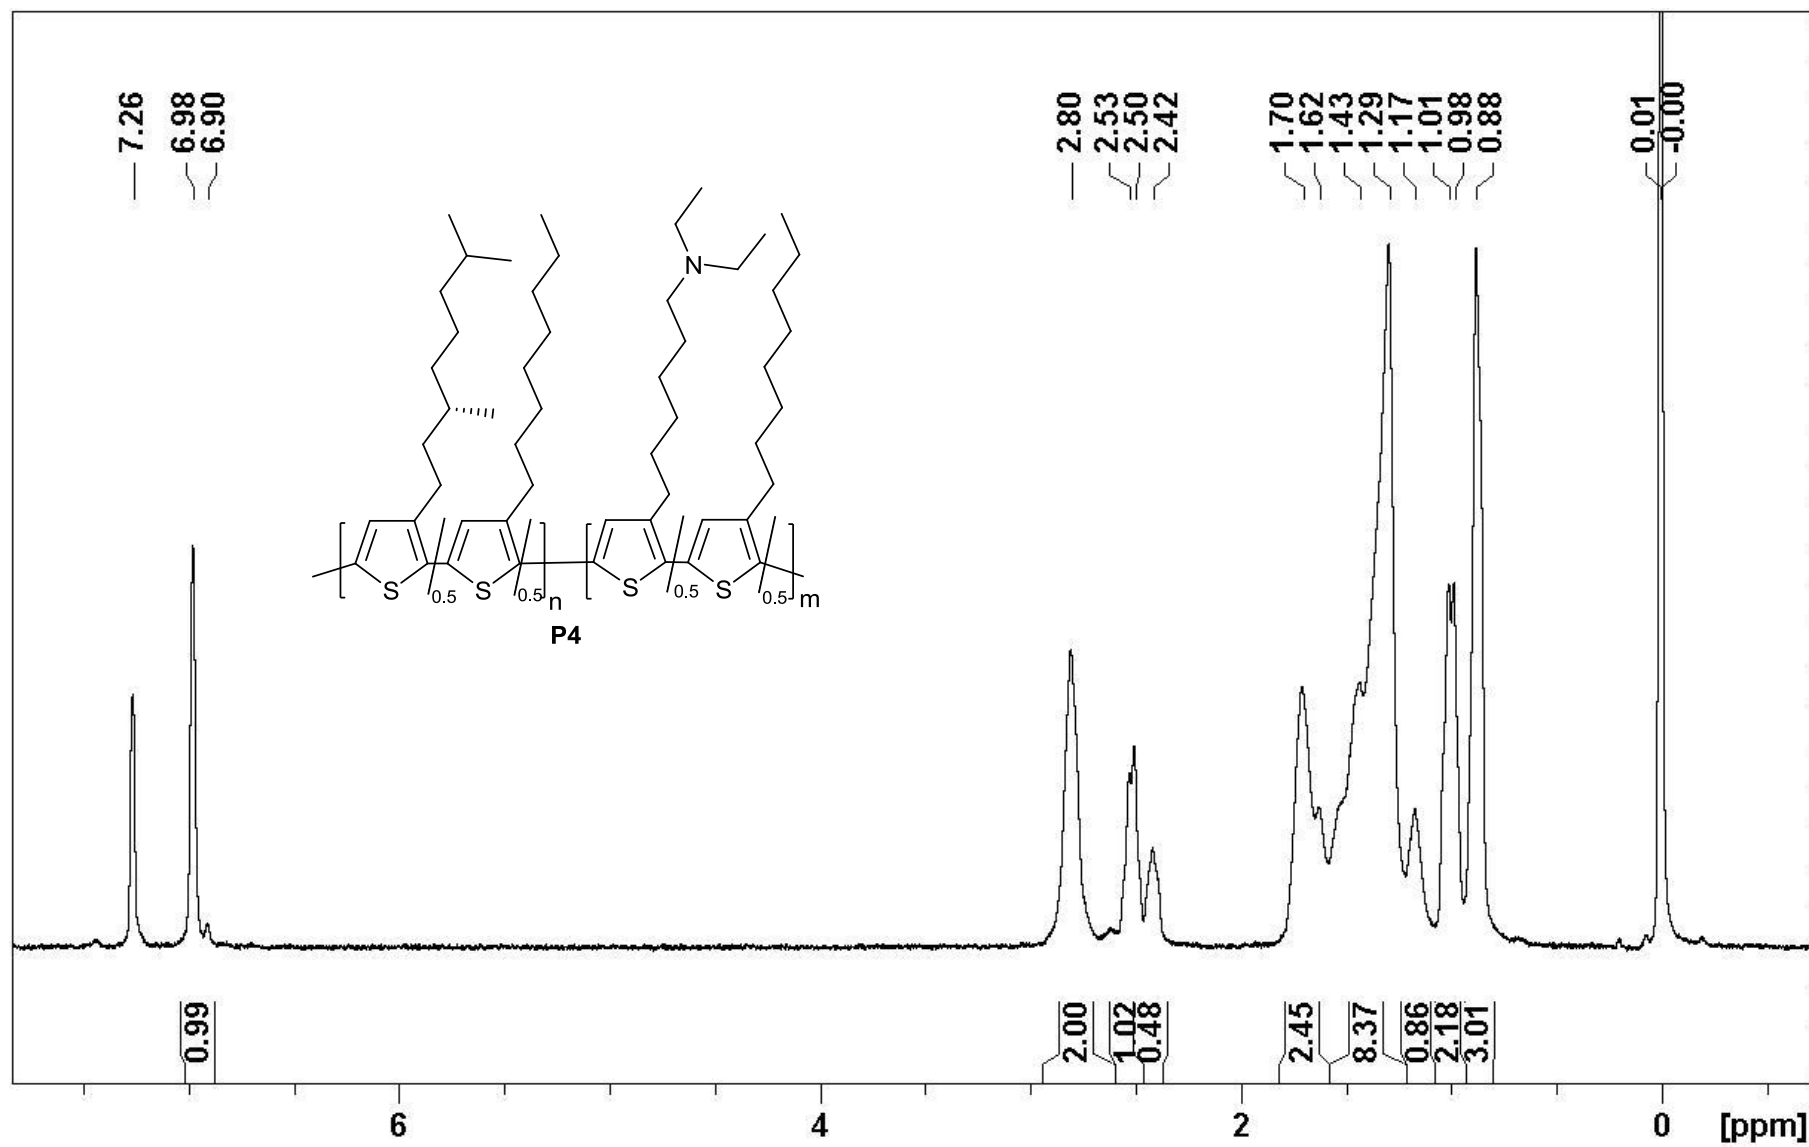

Figure S9:  $^1\text{H}$  NMR spectrum of P5.

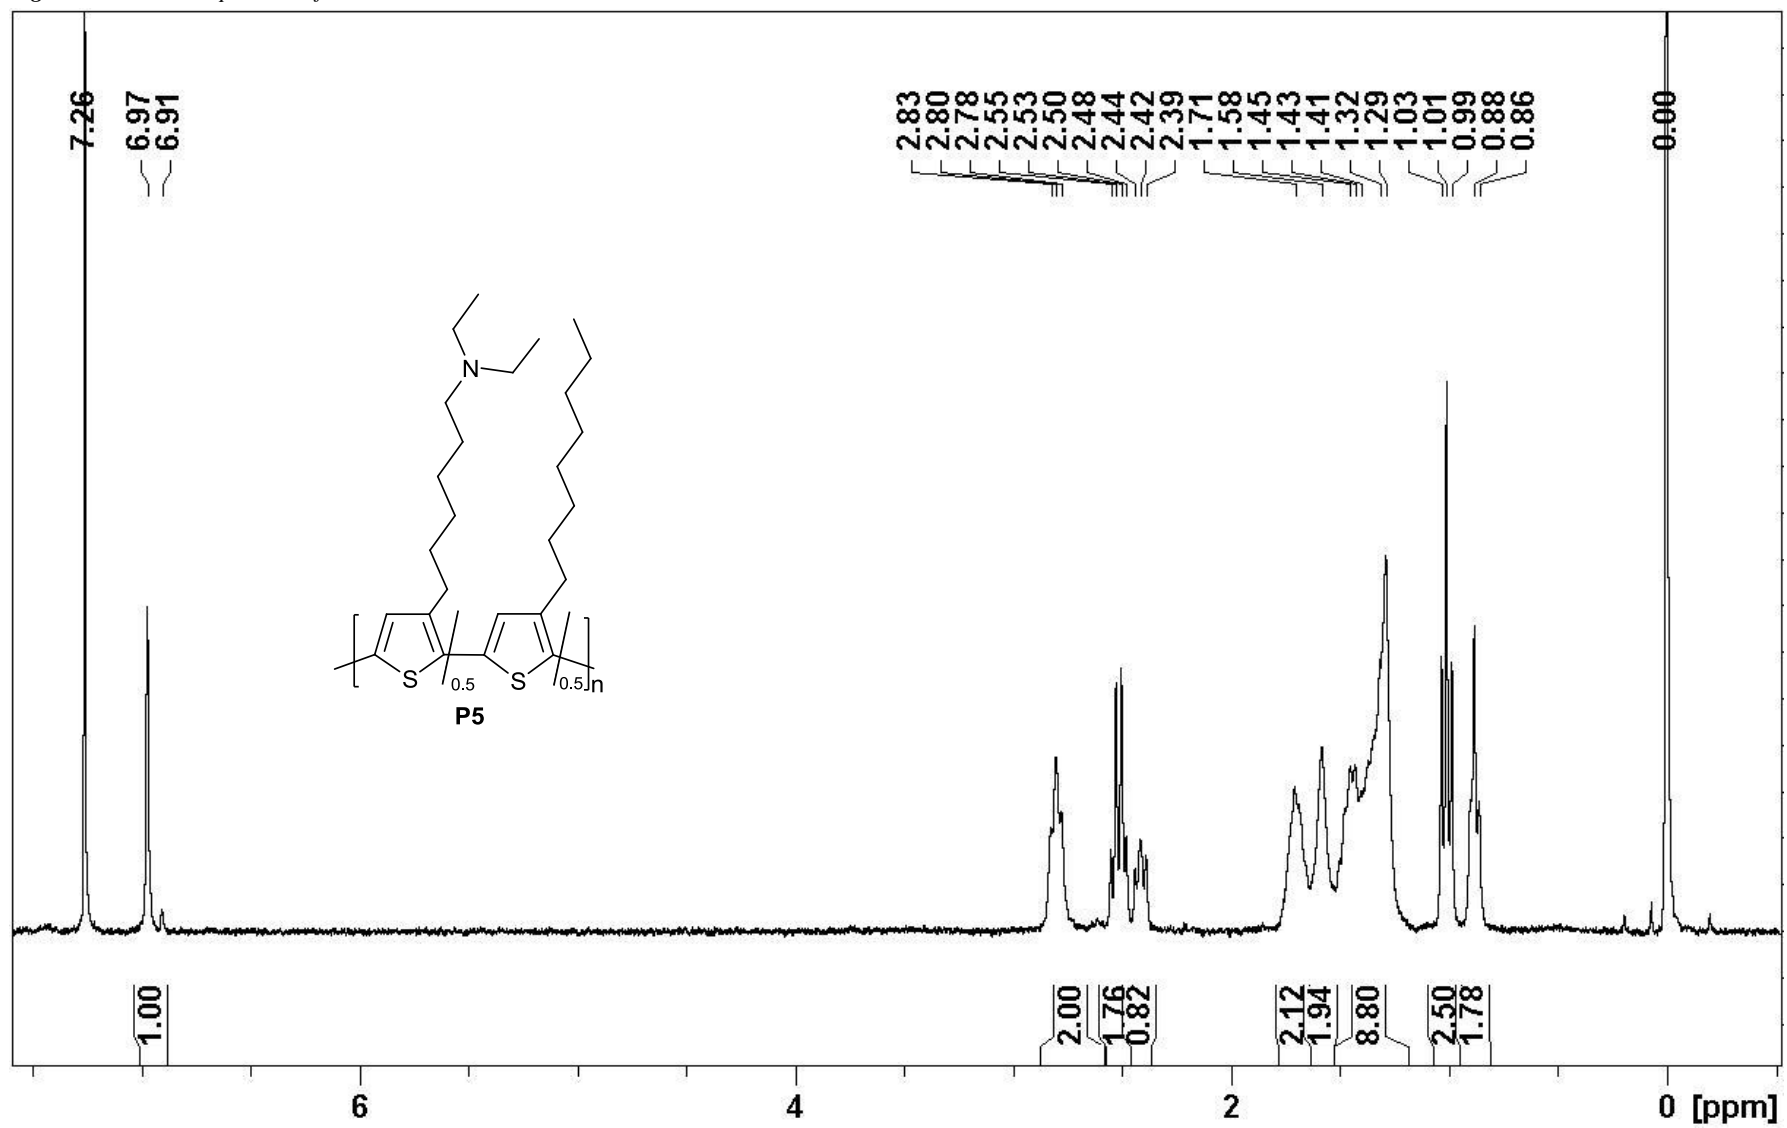

Figure S10:  $^1\text{H}$  NMR spectrum of P6.

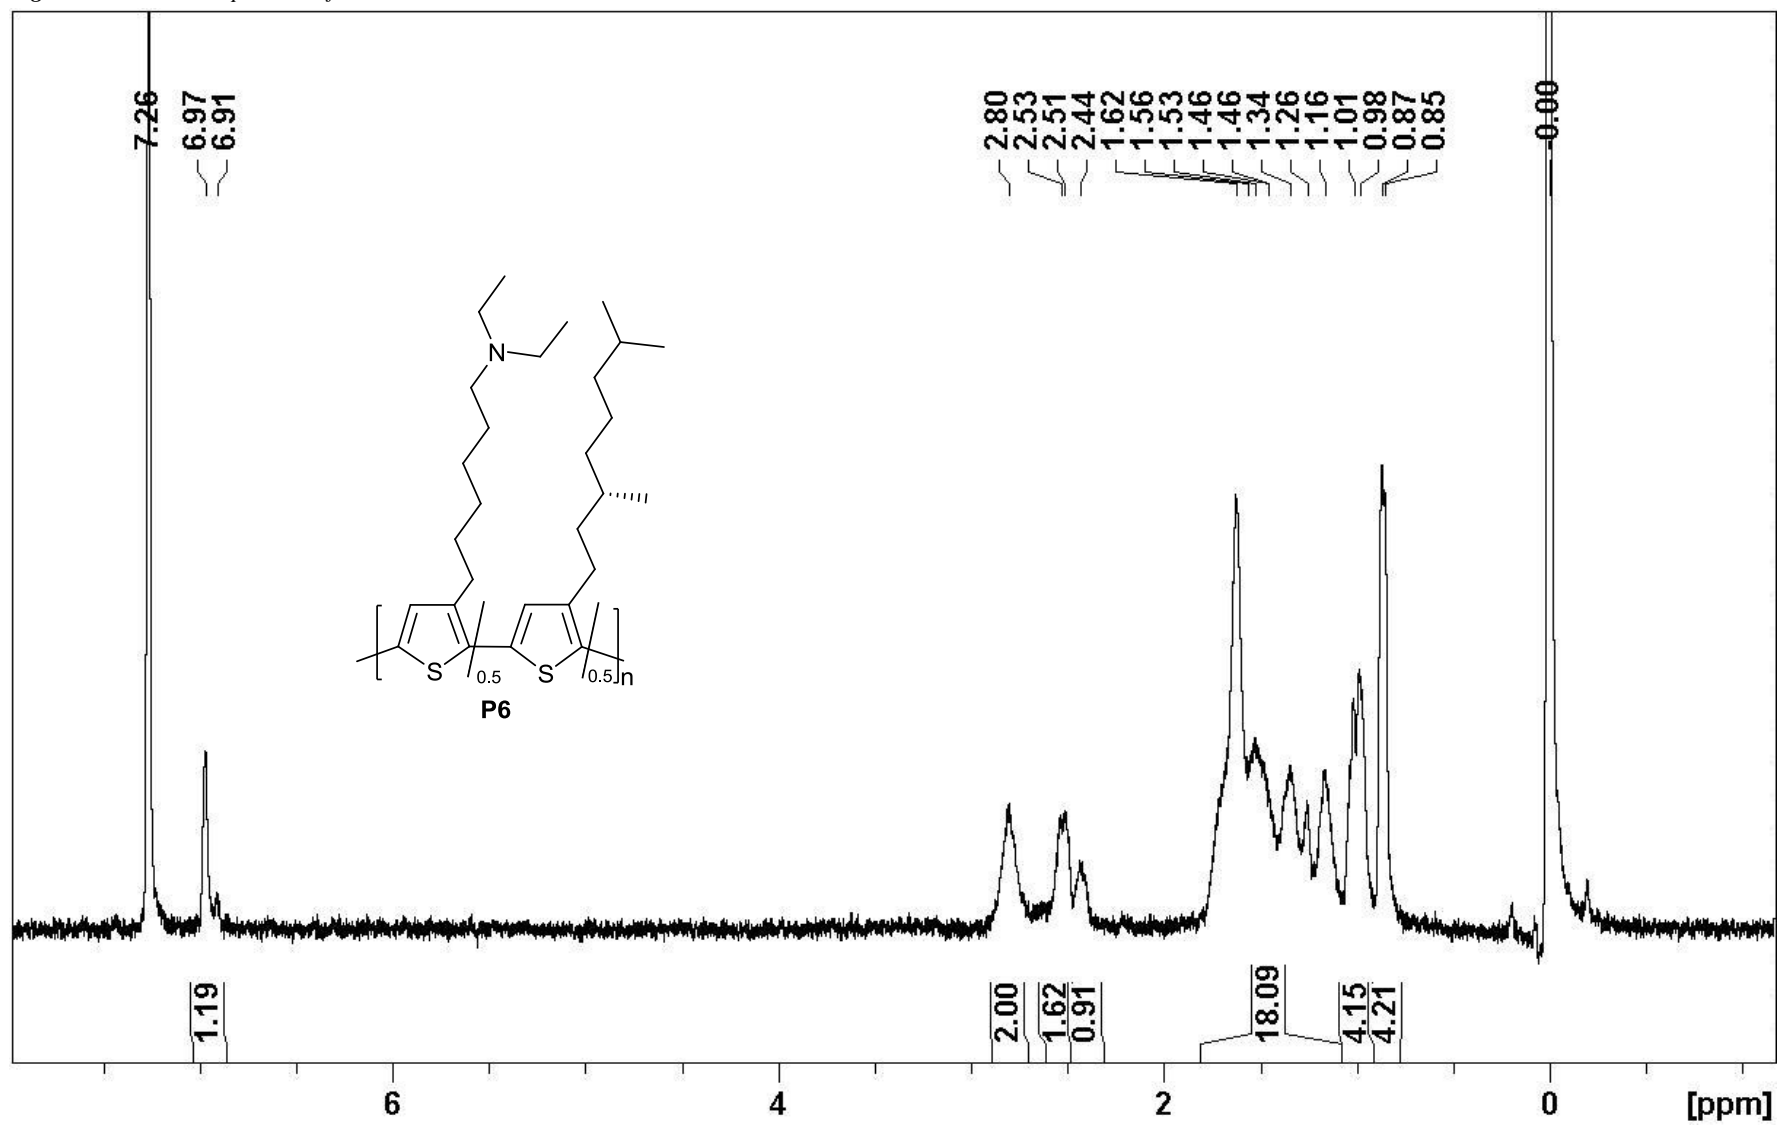

## B. UV-vis & CD spectroscopy

### 1. In solution

#### i. Neutral media

**Figure S11:** UV-vis, CD and g<sub>abs</sub> spectra for the solvatochromism experiments of **P2** in a neutral THF/MeOH mixture. The ratio THF/MeOH is given in the legend.

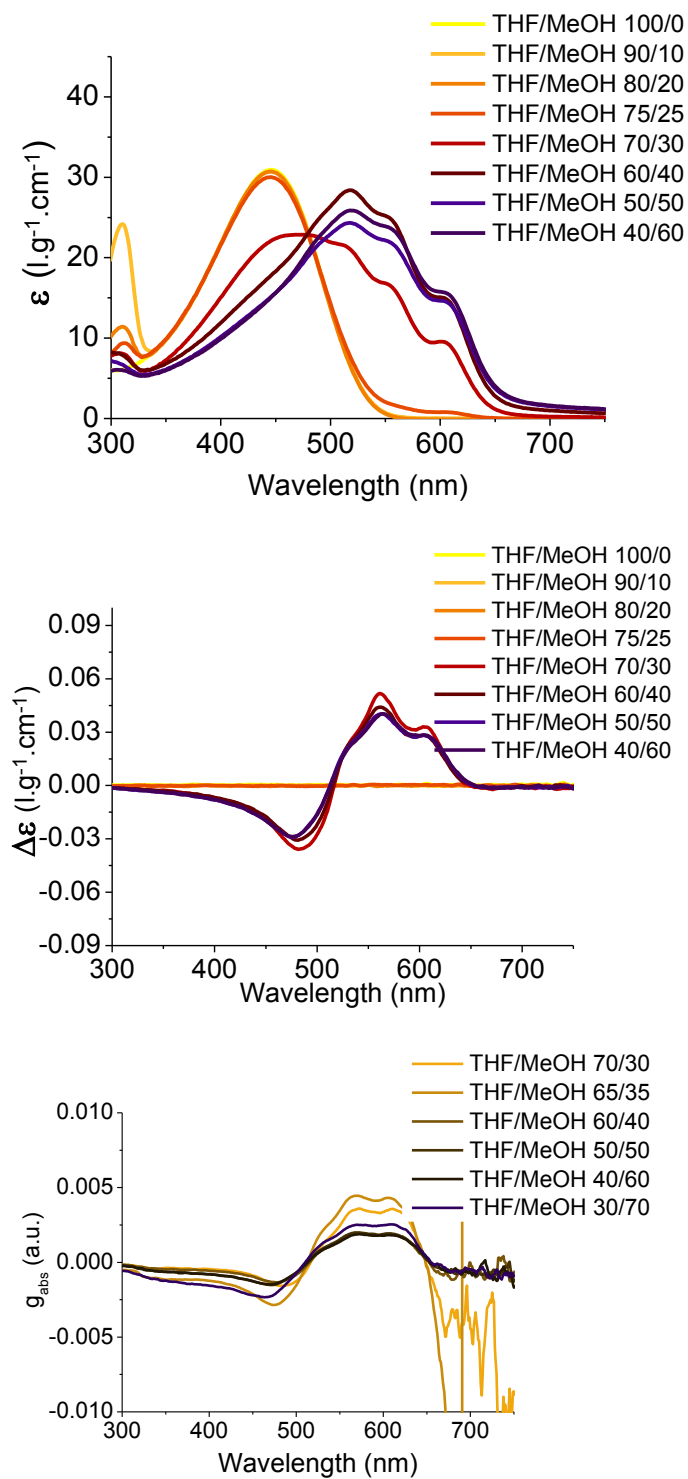

**Figure S12:** UV-vis, CD and  $g_{abs}$  spectra for the addition of acid to **P2** in a neutral THF/MeOH mixture of THF/MeOH 40/60.

The ratio THF/MeOH is given in the legend.

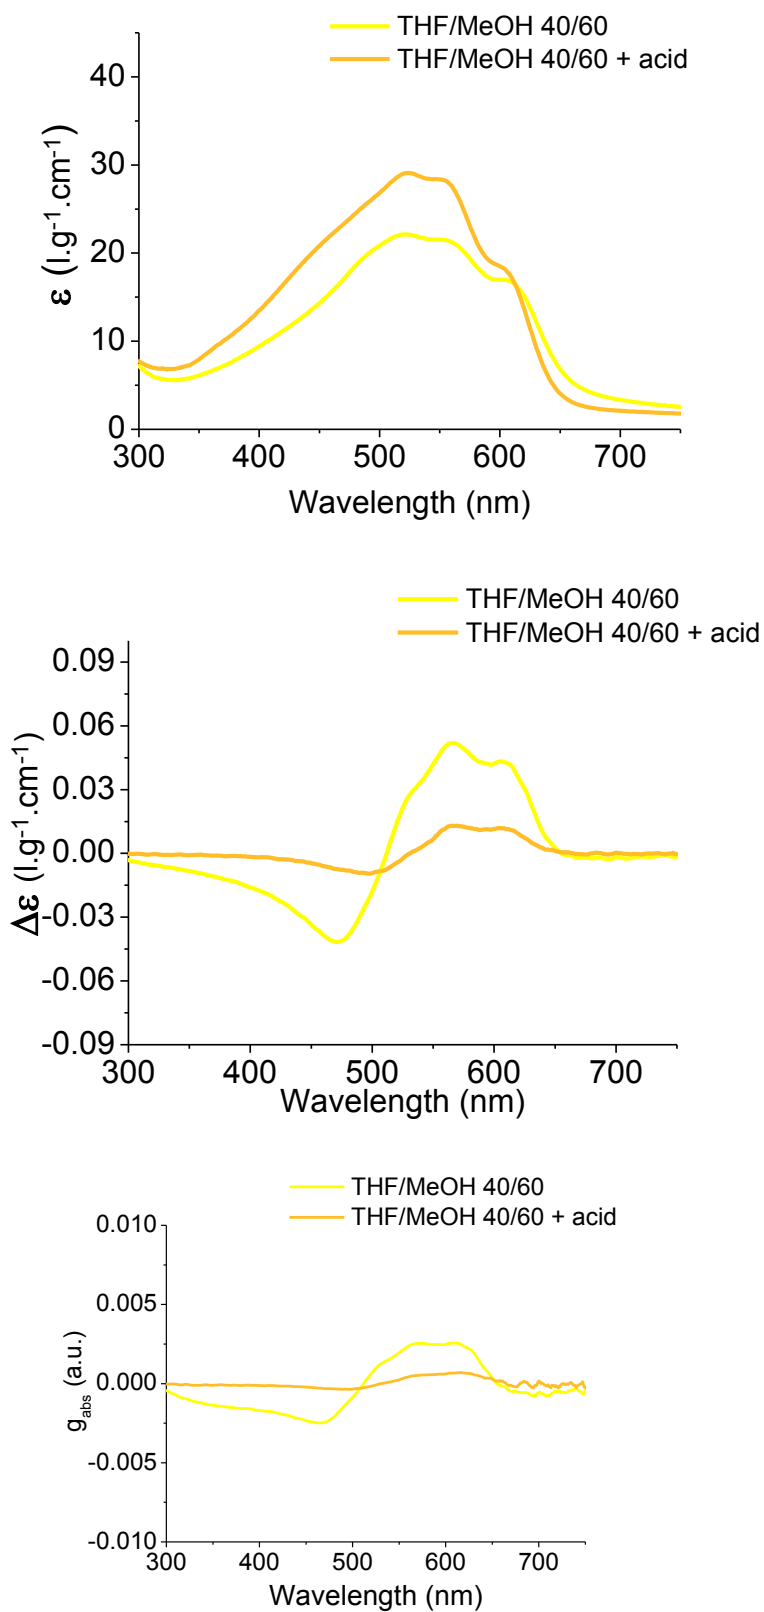

**Figure S13:**  $g_{abs}$  spectra of **P3** in a neutral THF/MeOH mixture.  
The ratio THF/MeOH is 40/60.

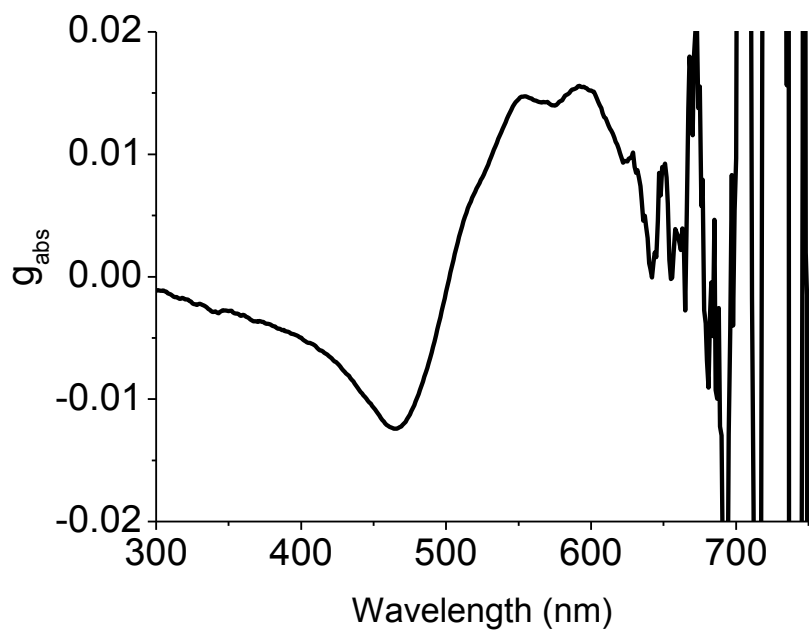

**Figure S14:** UV-vis, CD and  $g_{\text{abs}}$  spectra for the addition of acid to **P4** in a neutral THF/MeOH mixture of THF/MeOH 40/60.

The ratio THF/MeOH is given in the legend.

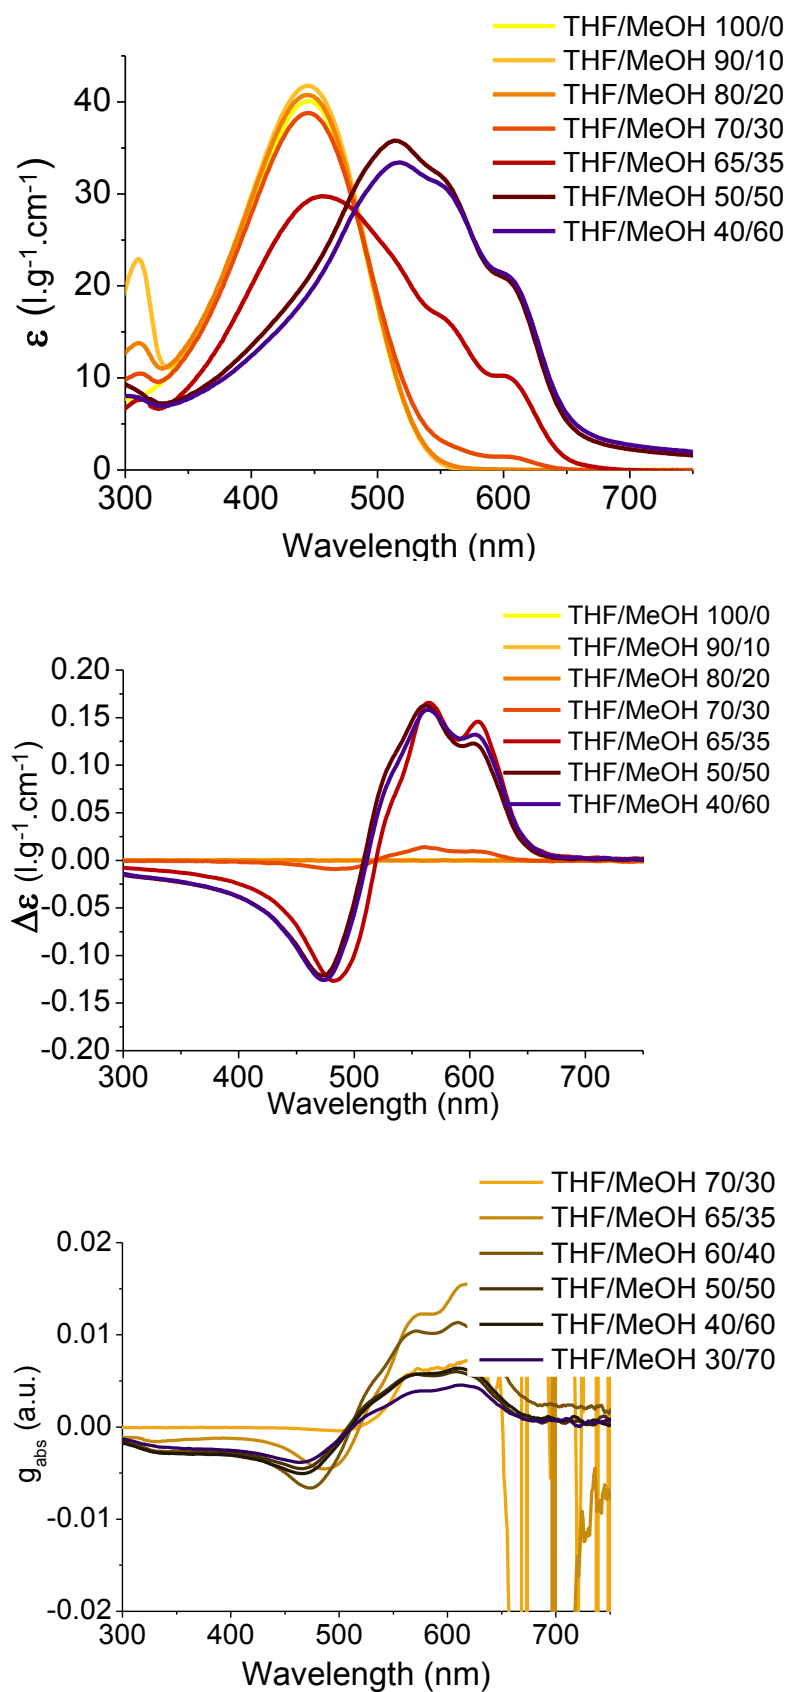



**Figure S15:** UV-vis, CD and  $g_{\text{abs}}$  spectra for the addition of acid to **P4** in neutral THF/MeOH 40/60 mixture. The ratio THF/MeOH is given in the legend.

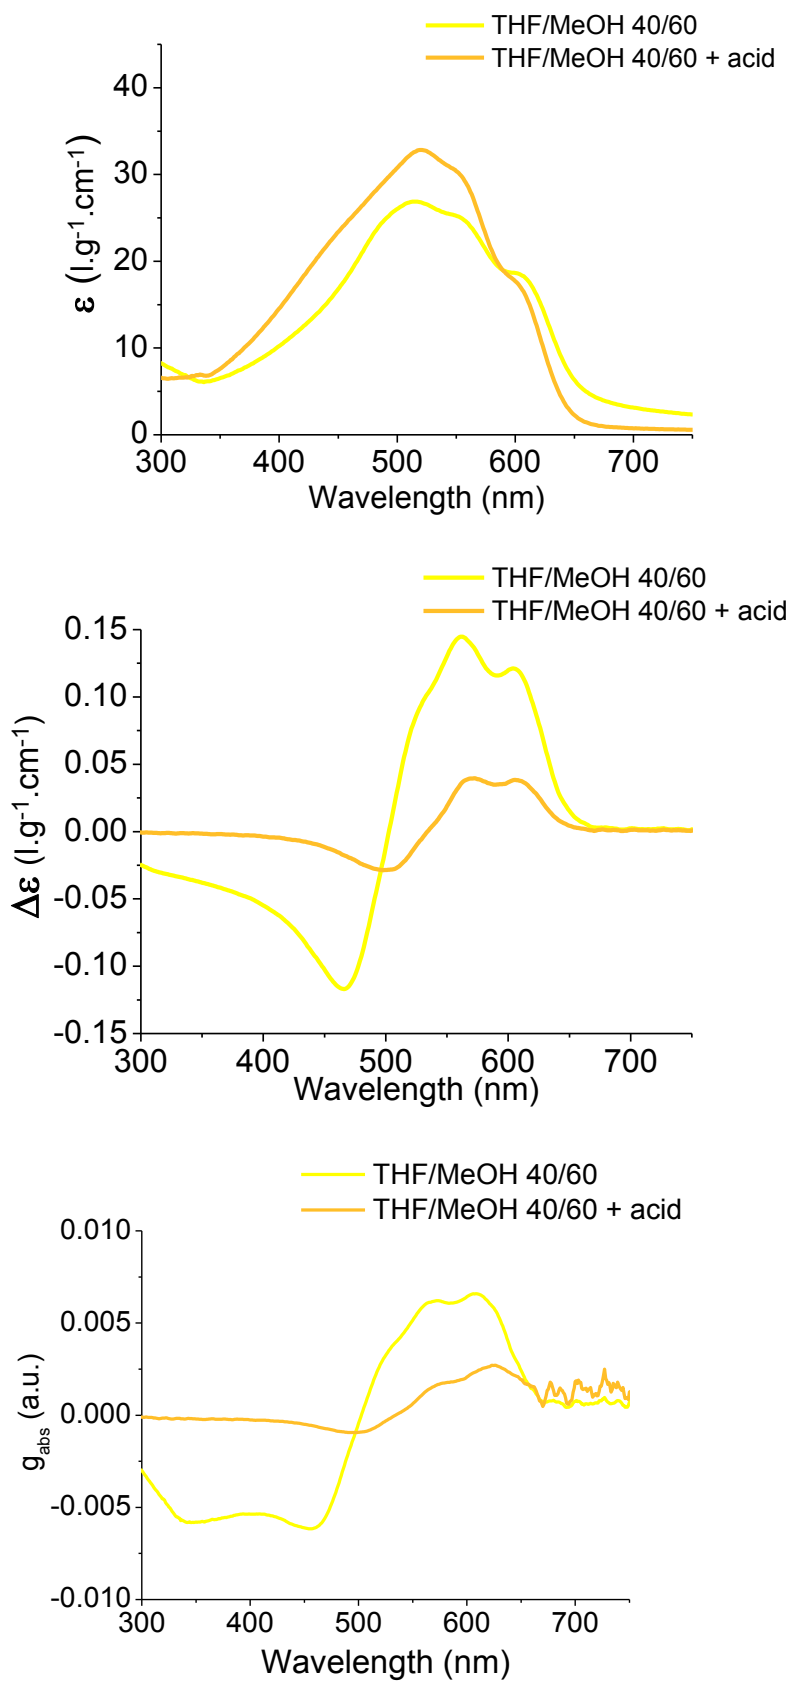

**Figure S16:** UV-vis, CD and  $g_{\text{abs}}$  spectra for the solvatochromism experiments of **P5** in a neutral THF/MeOH mixture. The ratio THF/MeOH is given in the legend.

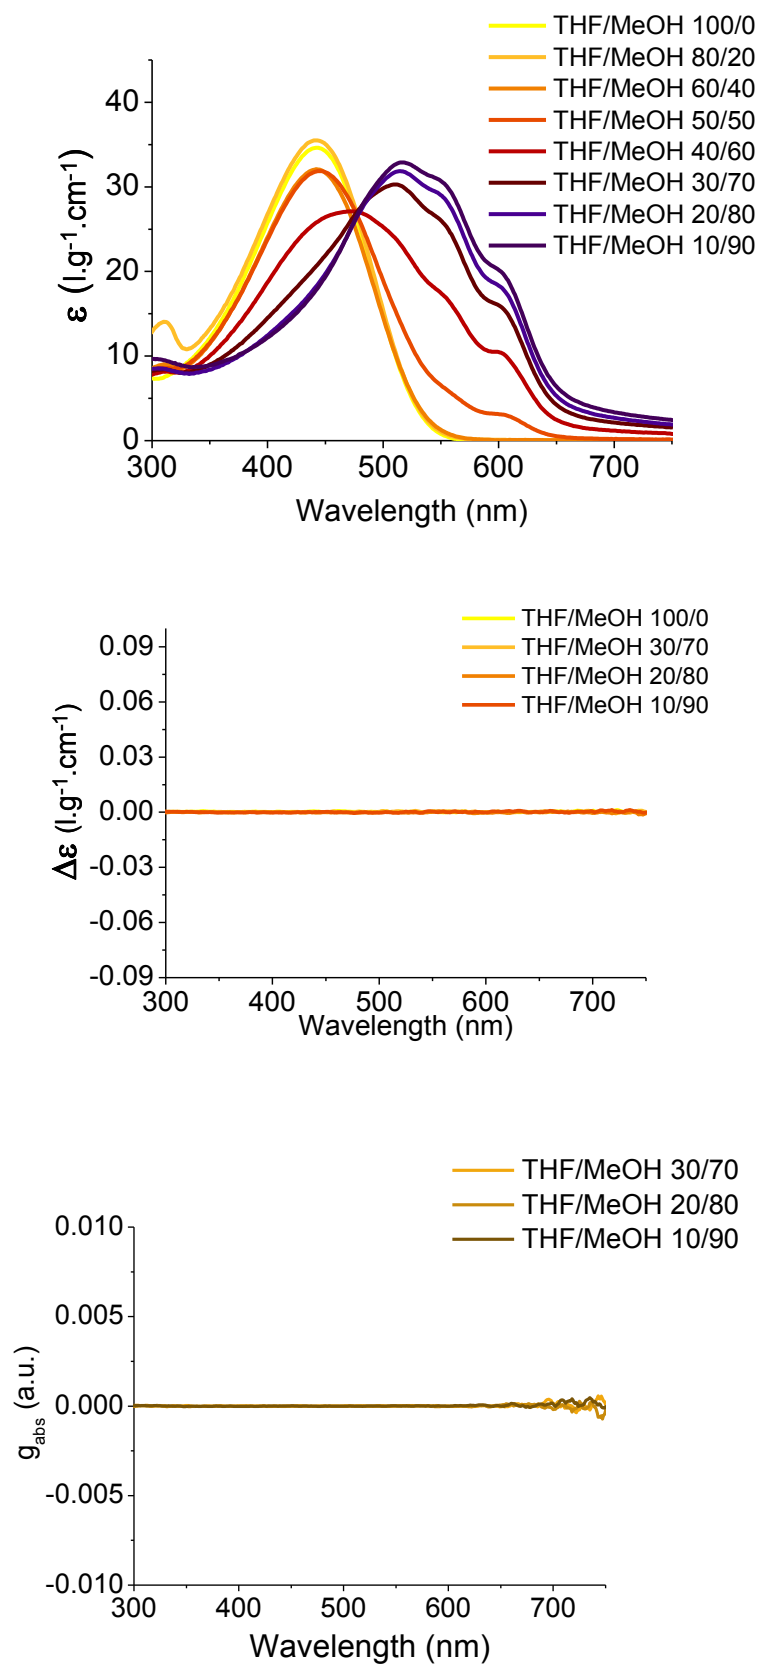

**Figure S17:** UV-vis, CD and  $g_{\text{abs}}$  spectra for the addition of acid to **P5** in a neutral THF/MeOH 20/80 mixture. The ratio THF/MeOH is given in the legend.

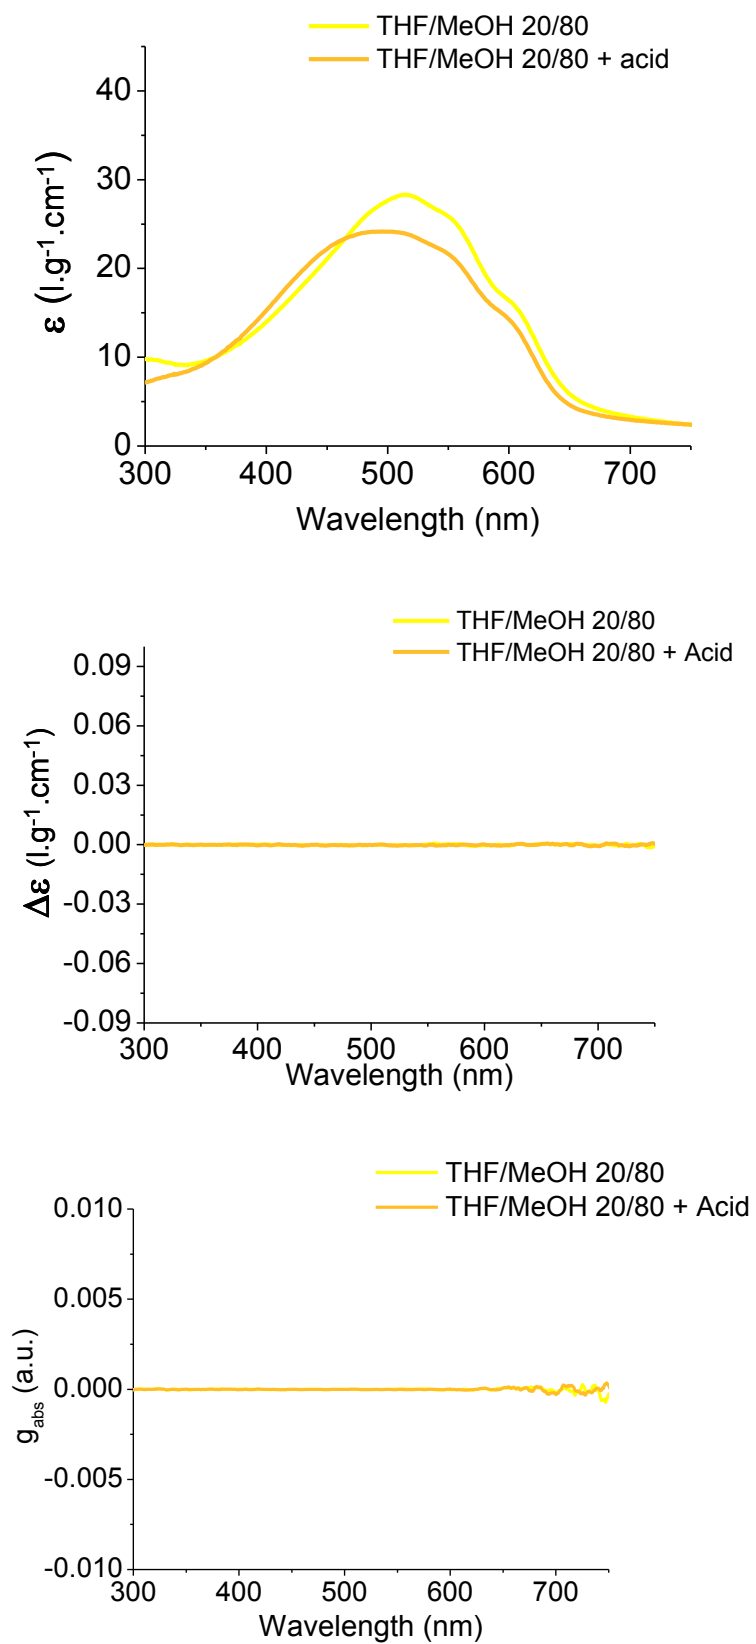

**Figure S18:** UV-vis, CD and  $g_{\text{abs}}$  spectra for the solvatochromism experiments of **P6** in a neutral THF/MeOH mixture. The ratio THF/MeOH is given in the legend.

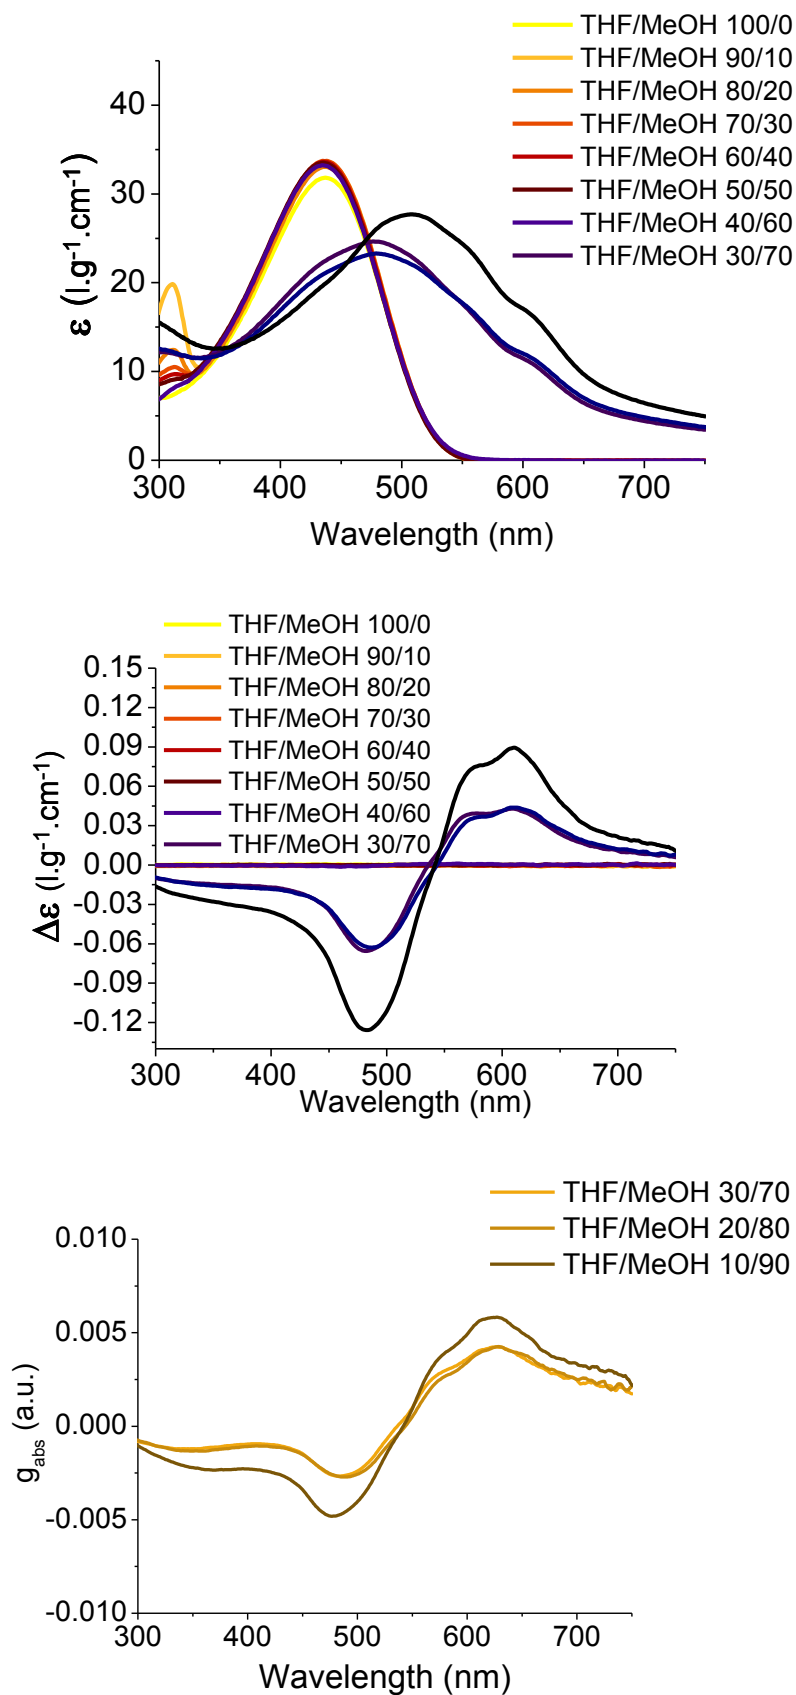

**Figure S19:** UV-vis, CD and  $g_{\text{abs}}$  spectra for the addition of acid to **P6** in a neutral THF/MeOH 20/80 mixture. The ratio THF/MeOH is given in the legend.

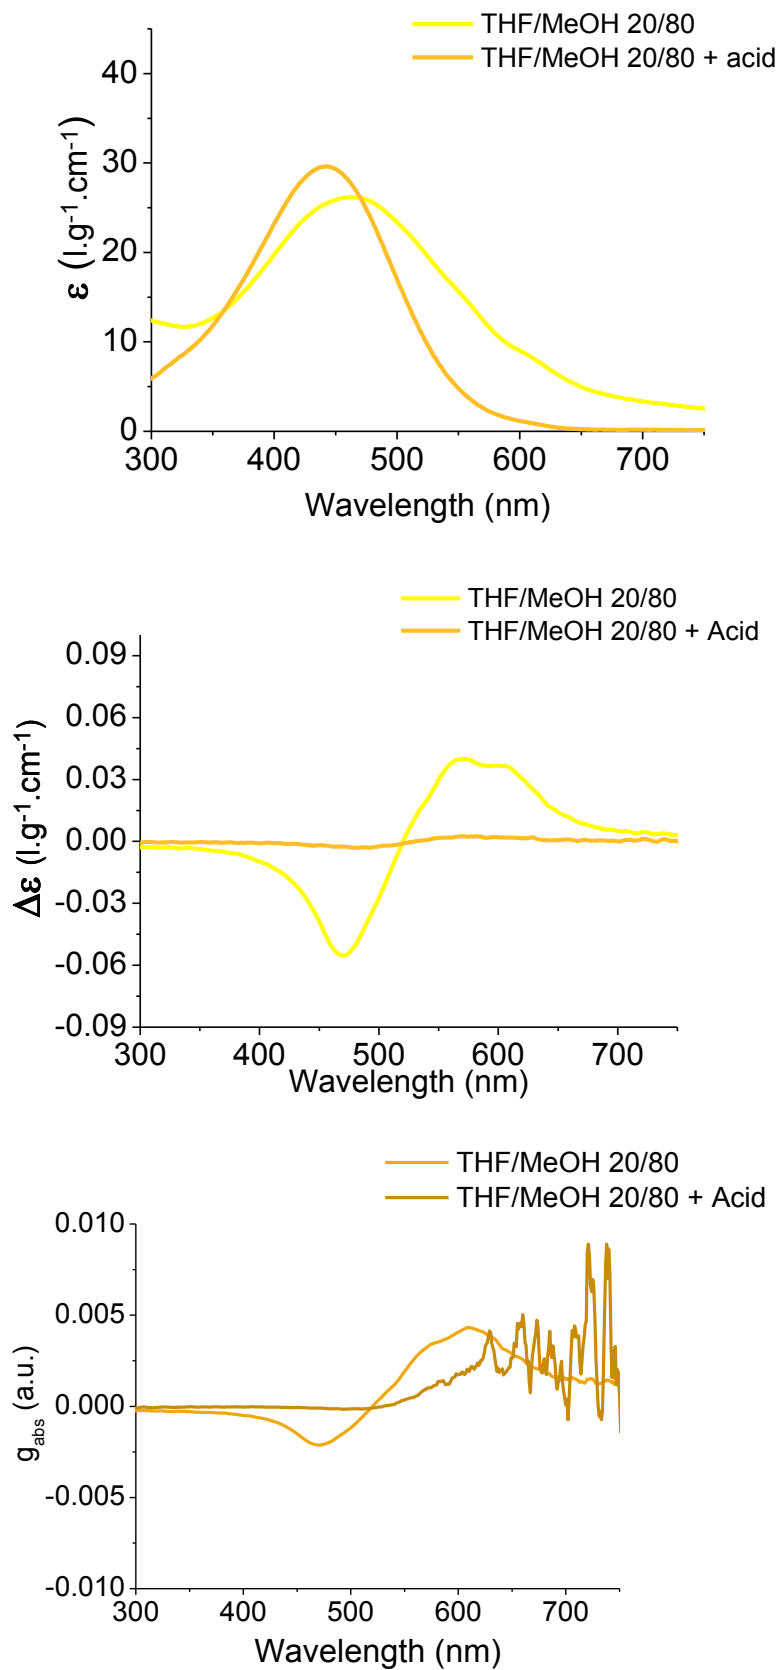

ii. *Acidic media*

**Figure S20:** UV-vis, CD and  $g_{\text{abs}}$  spectra for the solvatochromism experiments of **P2** in an acidic THF/MeOH mixture. The ratio THF/MeOH is given in the legend.

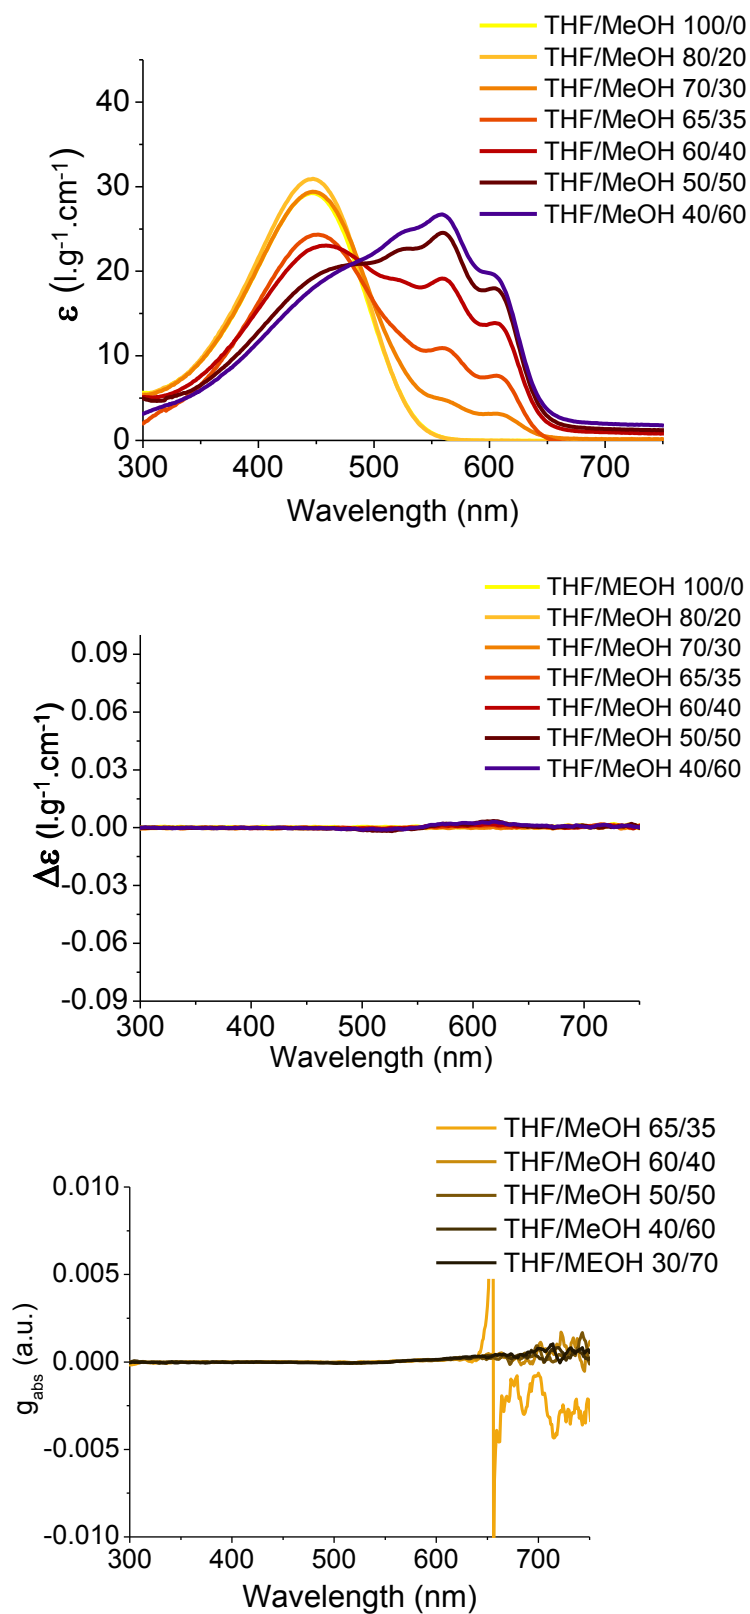

**Figure S21:** UV-vis, CD and  $g_{\text{abs}}$  spectra for the addition of base to **P2** in an acidic THF/MeOH 40/60 mixture. The ratio THF/MeOH is given in the legend.

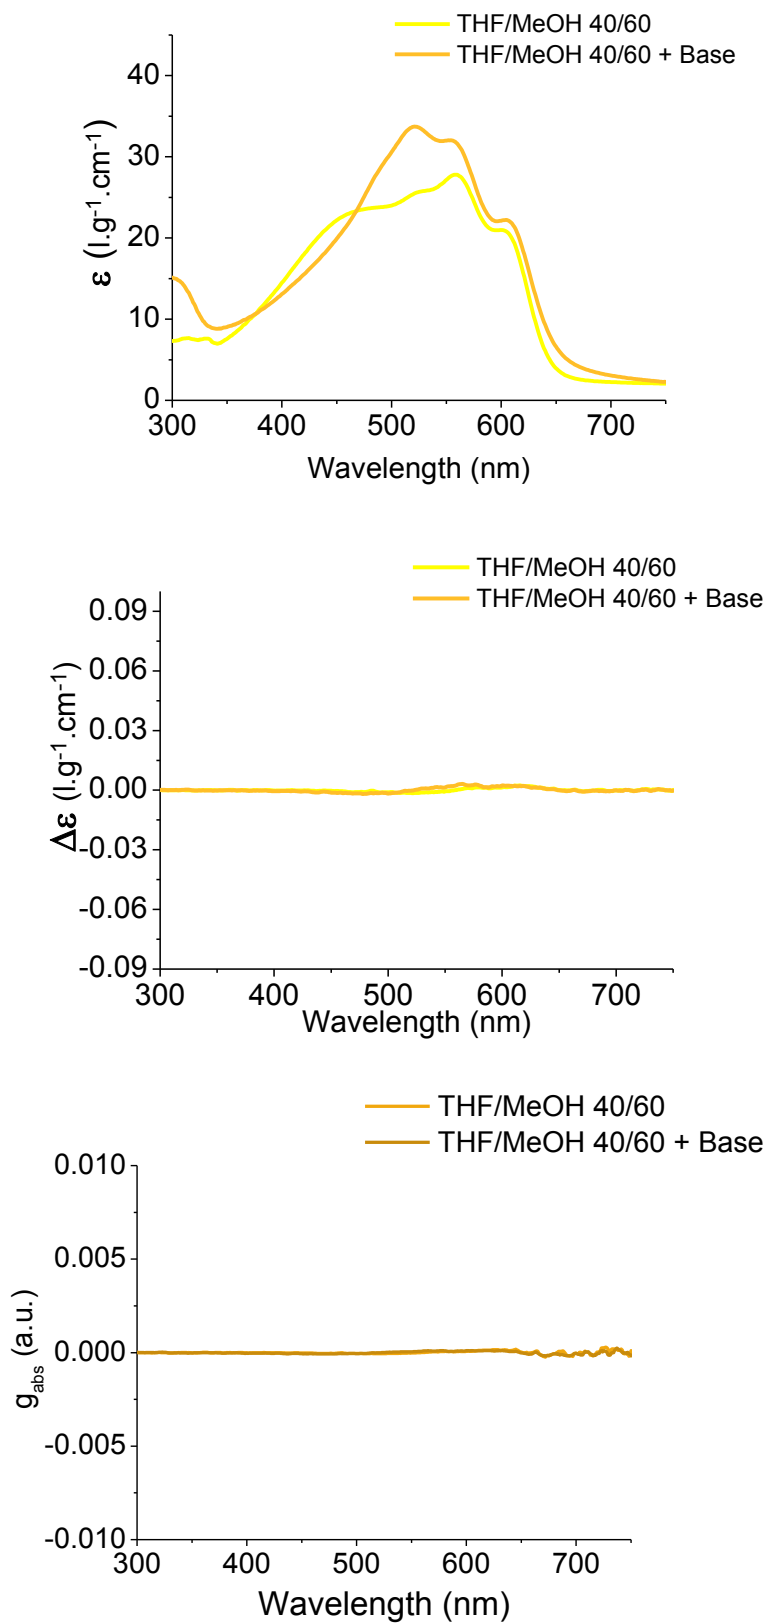

**Figure S22:** UV-vis, CD and  $g_{\text{abs}}$  spectra for the solvatochromism experiments of **P4** in an acidic THF/MeOH mixture. The ratio THF/MeOH is given in the legend.

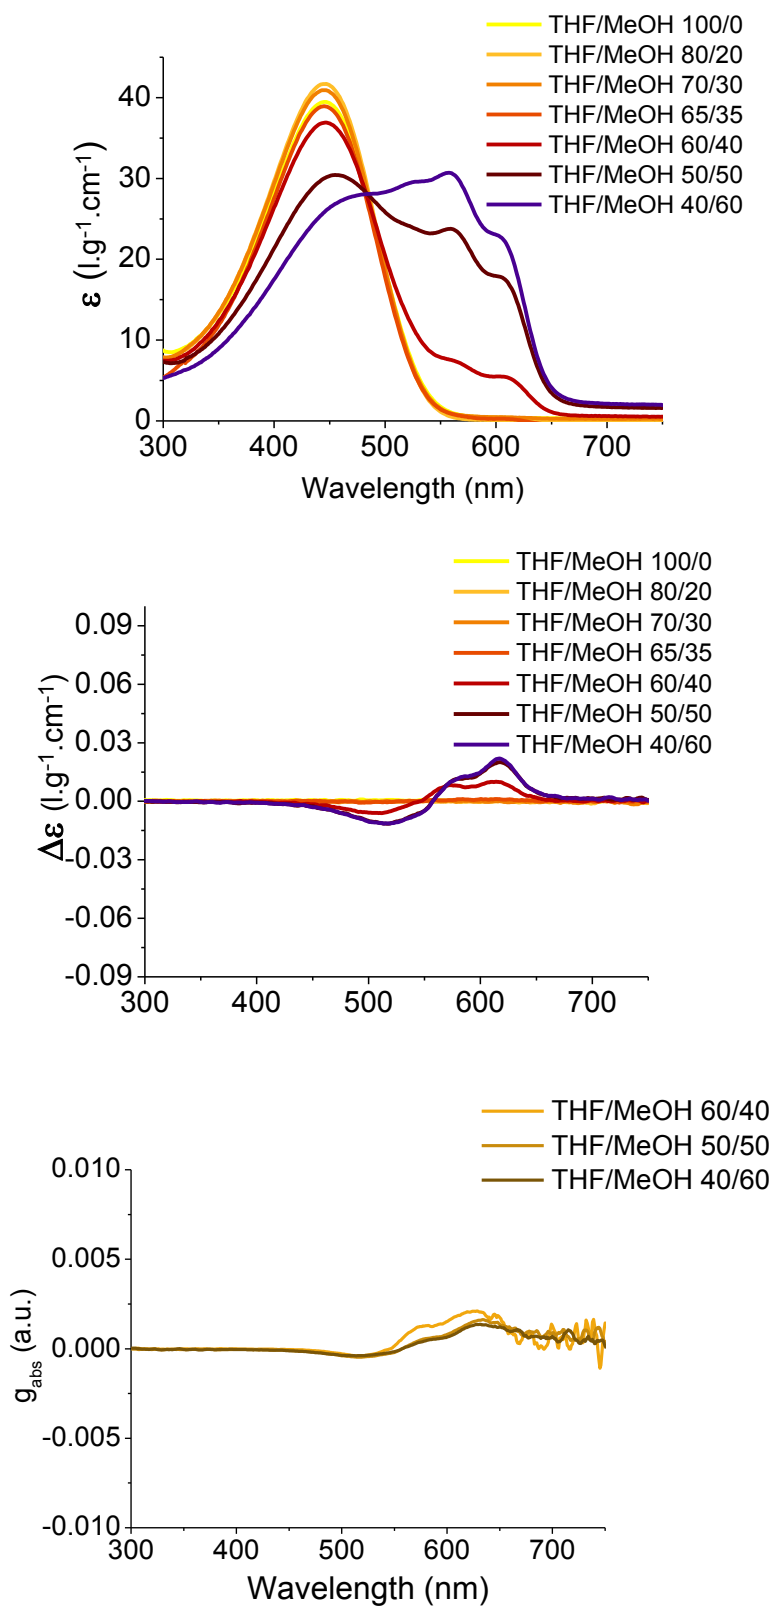



**Figure S23:** UV-vis, CD and  $g_{abs}$  spectra for the addition of base to **P4** in an acidic THF/MeOH 40/60 mixture. The ratio THF/MeOH is given in the legend.

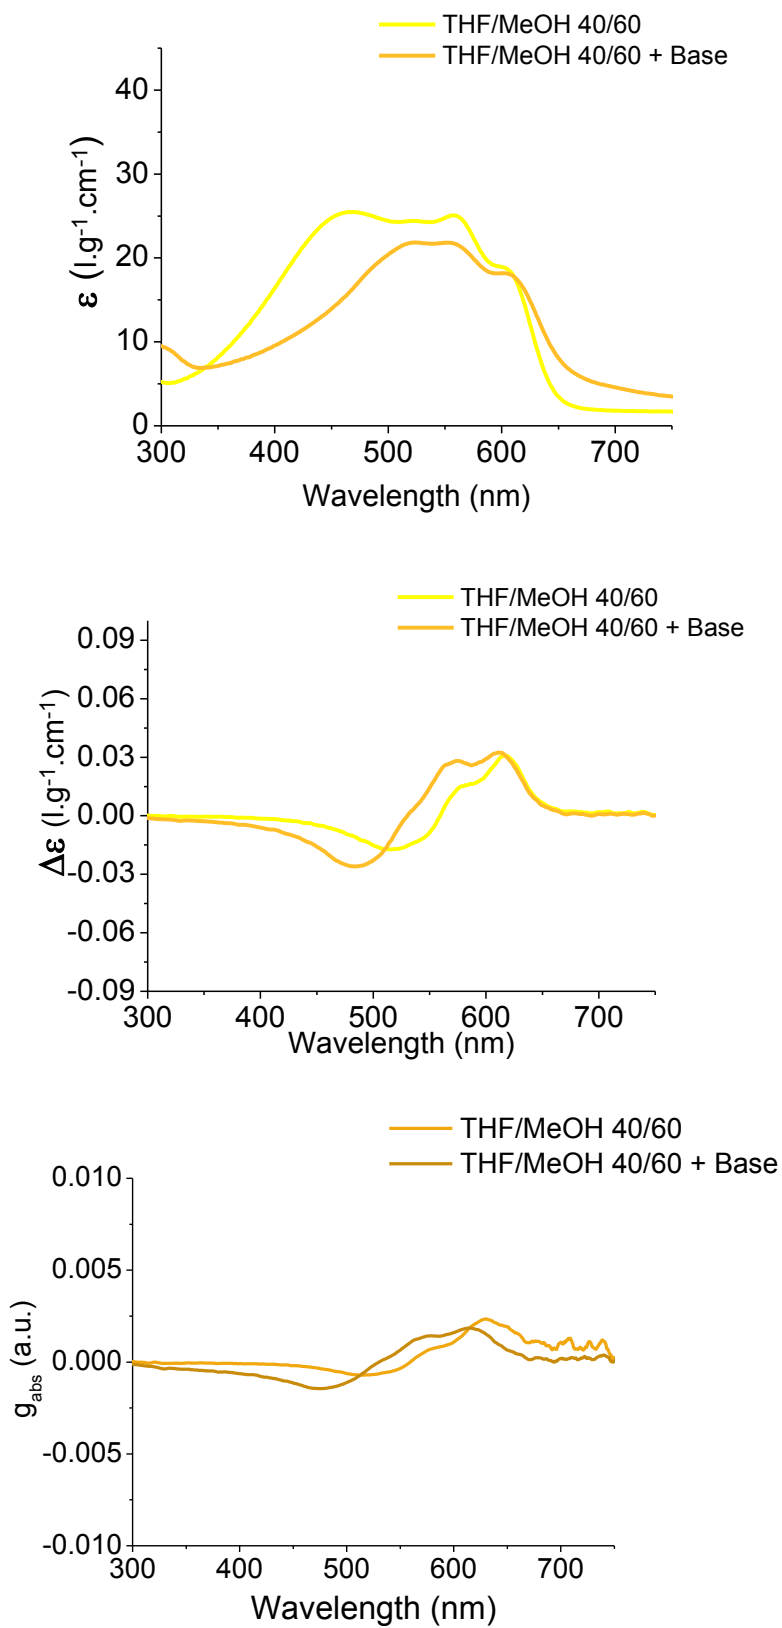

**Figure S24:** UV-vis, CD and  $g_{\text{abs}}$  spectra for the solvatochromism experiments of **P5** in an acidic THF/MeOH mixture. The ratio THF/MeOH is given in the legend.

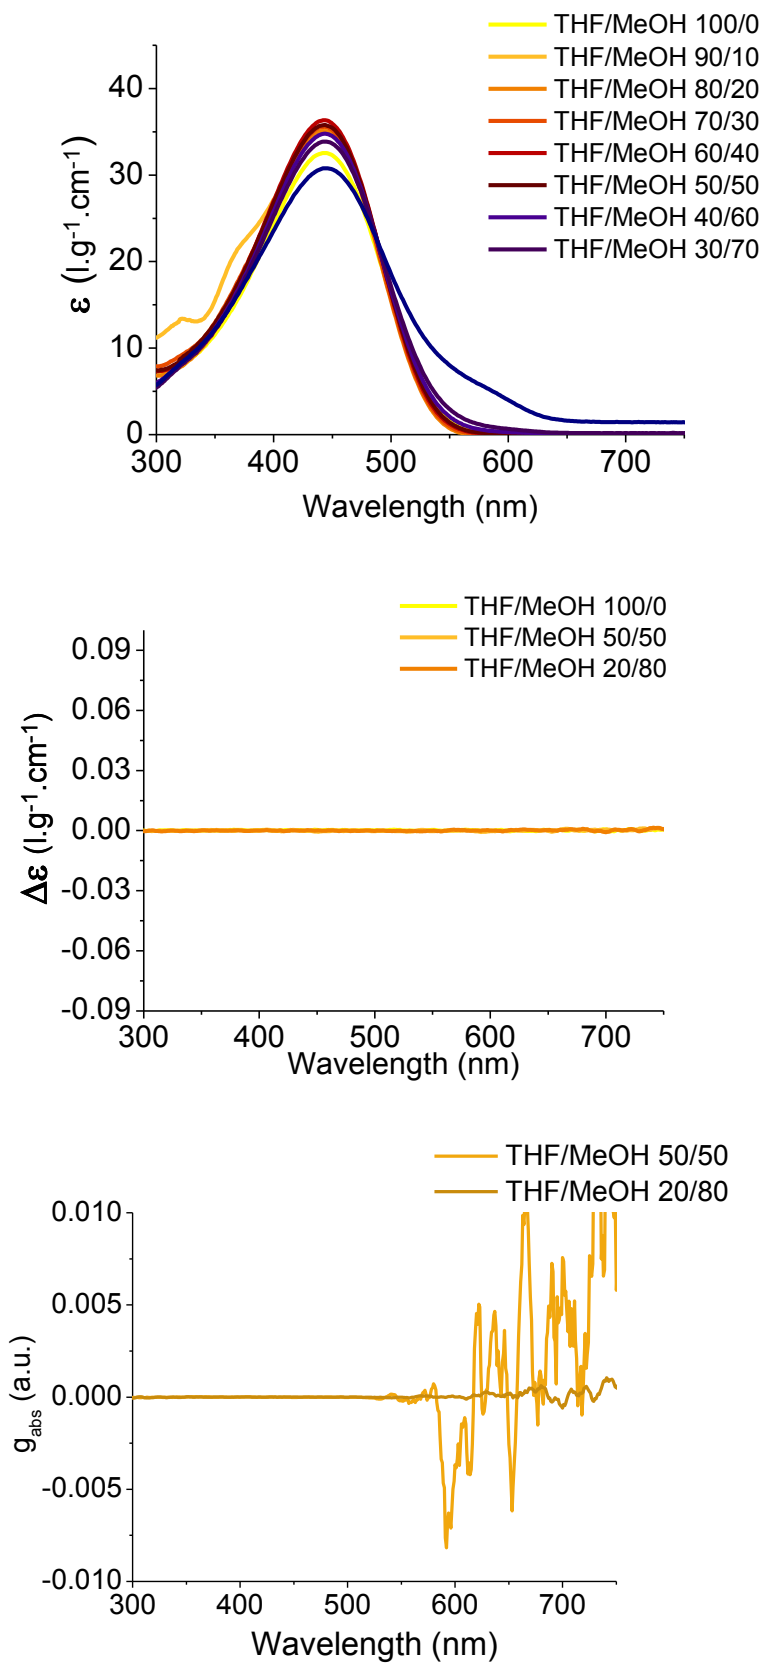

**Figure S25:** UV-vis, CD and  $g_{\text{abs}}$  spectra for the addition of base to **P5** in an acidic THF/MeOH 20/80 mixture. The ratio THF/MeOH is given in the legend.

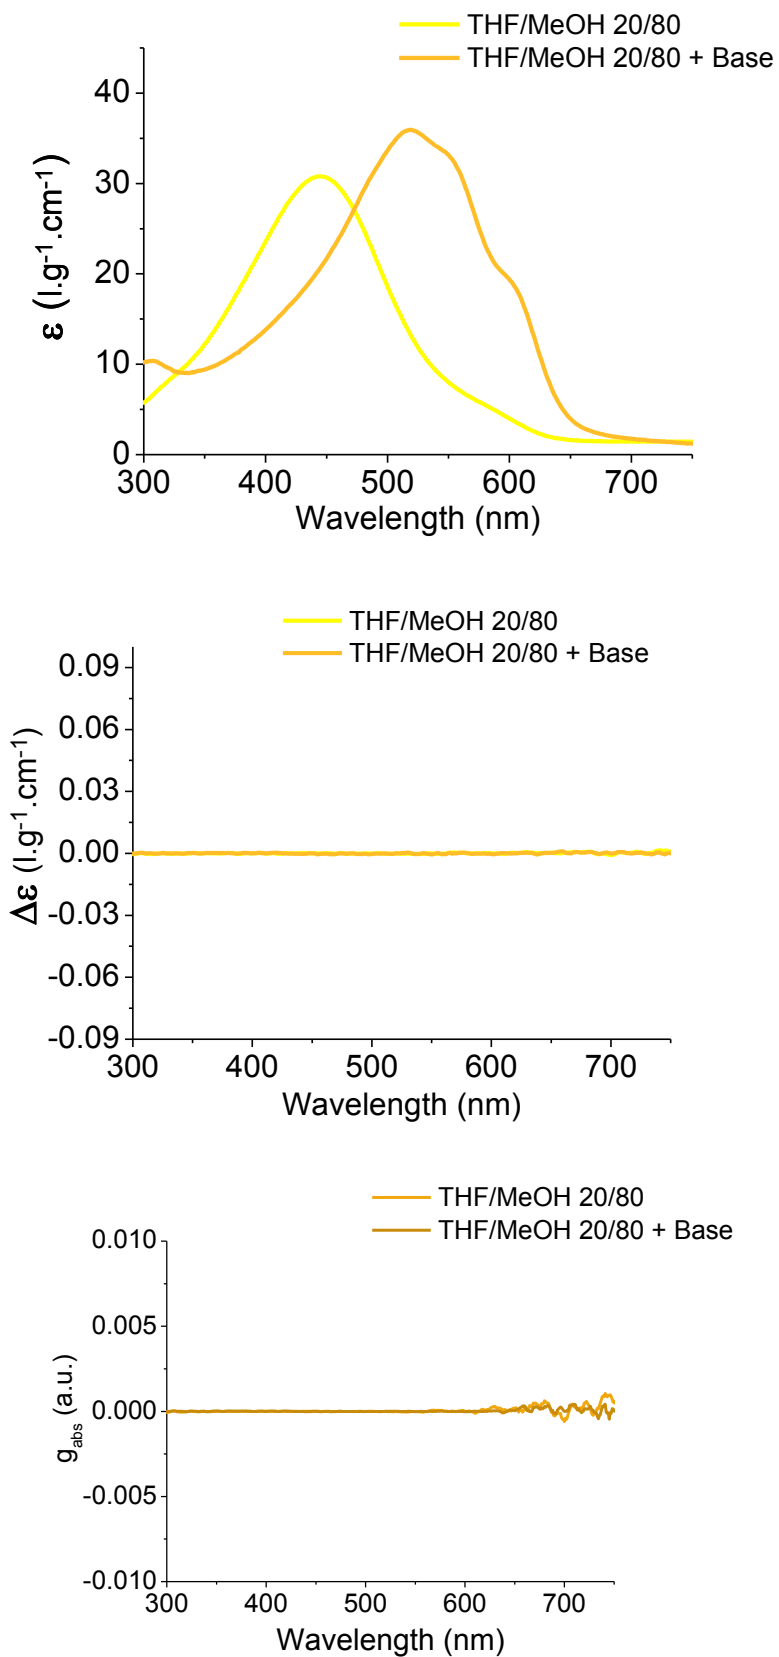

**Figure S26:** UV-vis, CD and  $g_{abs}$  spectra for the solvatochromism experiments of **P6** in an acidic THF/MeOH mixture. The ratio THF/MeOH is given in the legend.

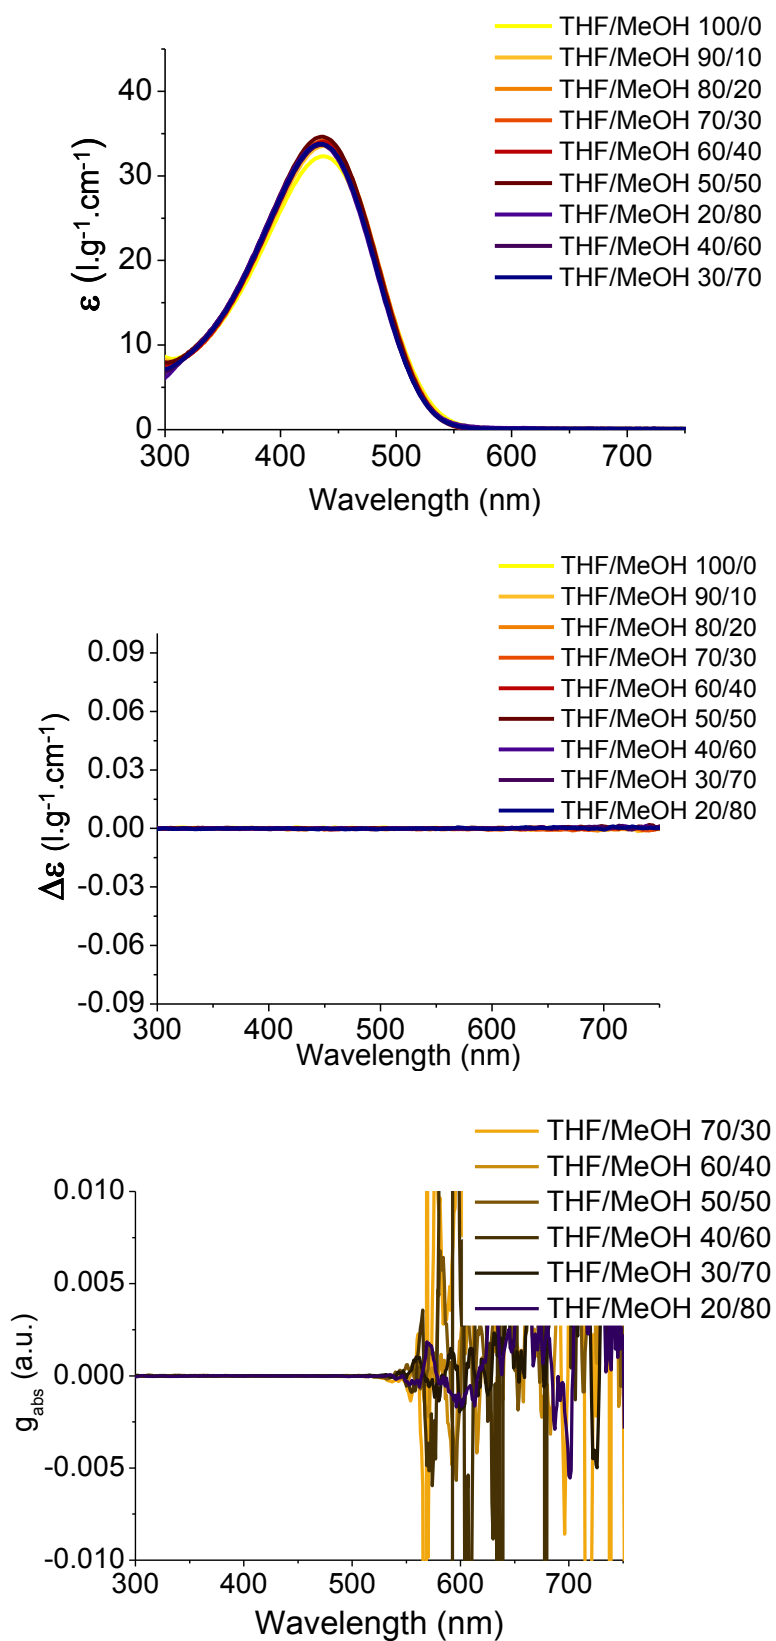

**Figure S27:** UV-vis, CD and  $g_{\text{abs}}$  spectra for the addition of base to **P6** in an acidic THF/MeOH 20/80 mixture. The ratio THF/MeOH is given in the legend.

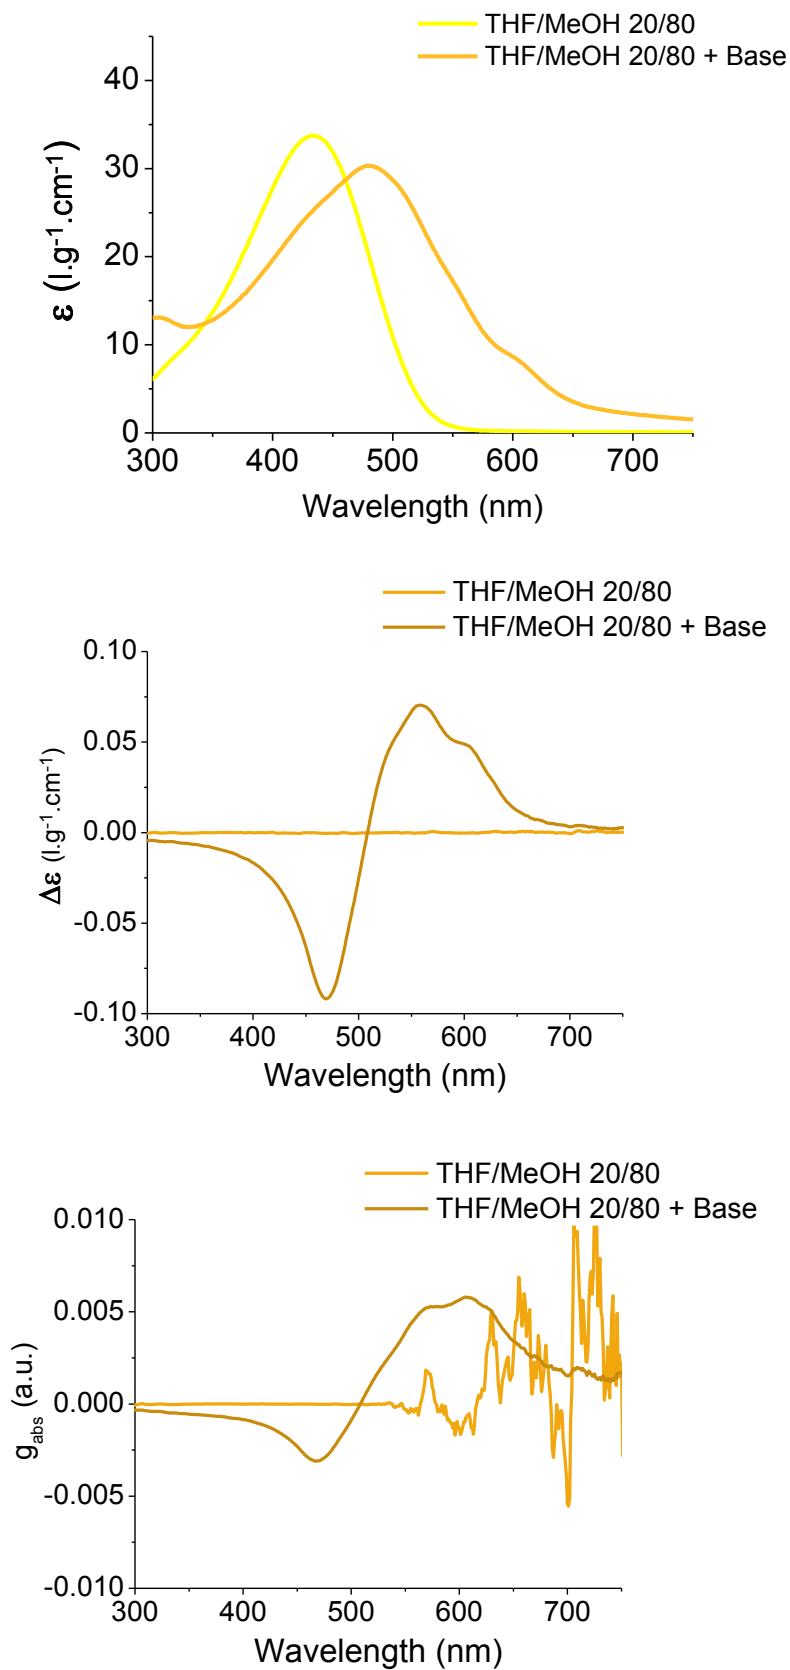

## 2. In film

Films were prepared by spin coating from neutral or acidified THF solutions (1200 rpm, 20 s) and the solutions were filtered with a 0.20  $\mu\text{m}$  filter prior to spin coating.

### i. Spincoated from neutral media

**Figure S28:** UV-vis, CD and  $g_{\text{abs}}$  spectra for the annealing experiments with **P2** with fast cooling.

Each run, the film is annealed for 1 min at the temperature given in the legend and cooled fast at room T.

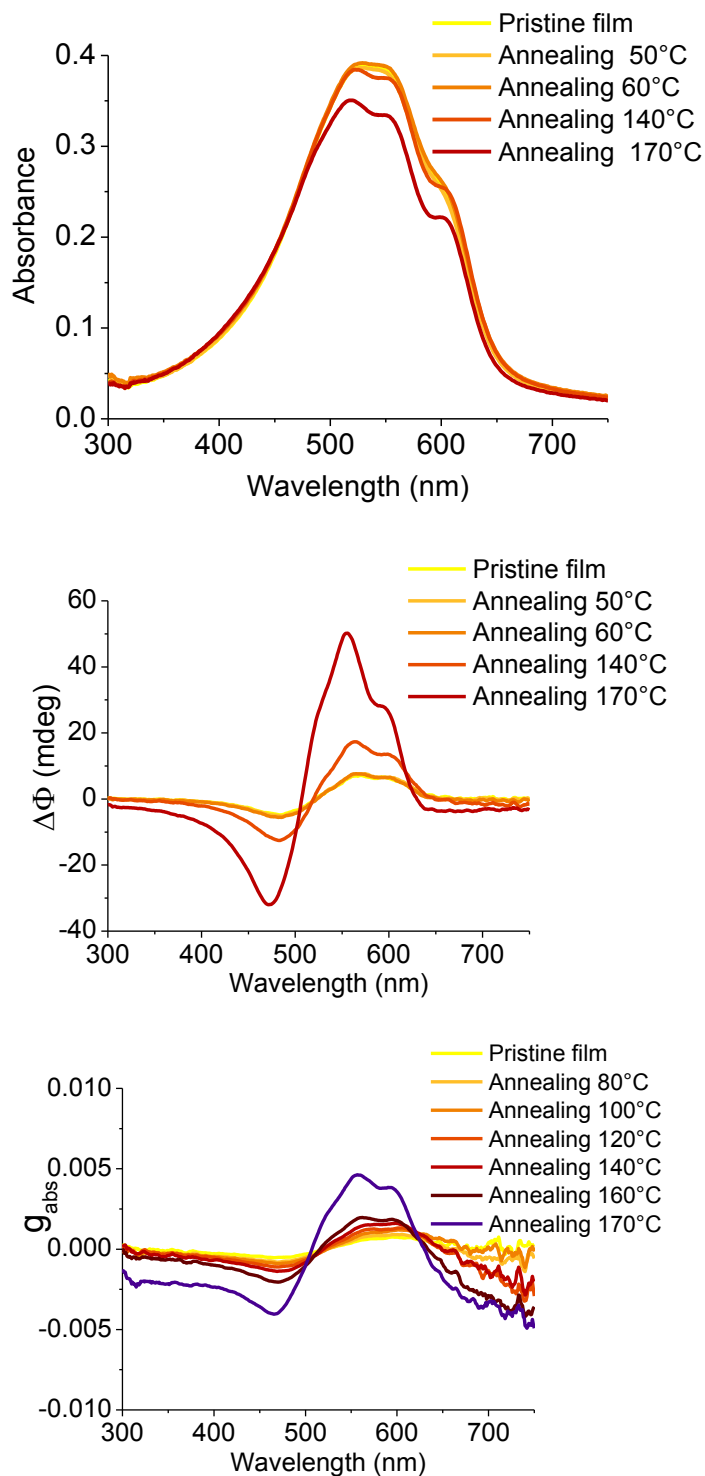

**Figure S29:** UV-vis, CD and  $g_{abs}$  spectra for the annealing experiments with **P2** with slow cooling.  
Each run, the film is annealed for 1 min at the temperature given in the legend and cooled slow at  $2\text{ }^{\circ}\text{C min}^{-1}$ .

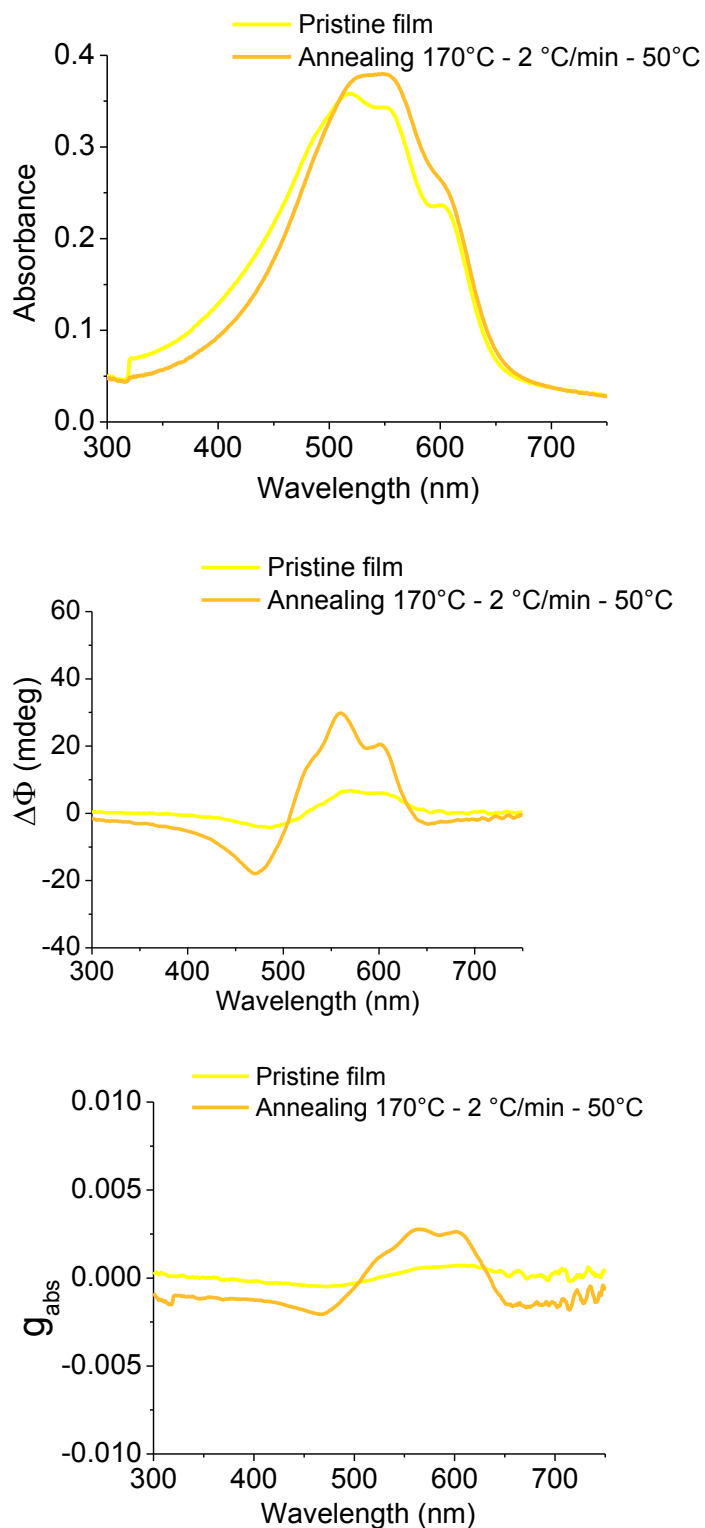

**Figure S30:** UV-vis, CD and  $g_{abs}$  spectra for the annealing experiments with **P3** with fast cooling.

Each run, the film is annealed for 1 min at the temperature given in the legend and cooled fast at room T.

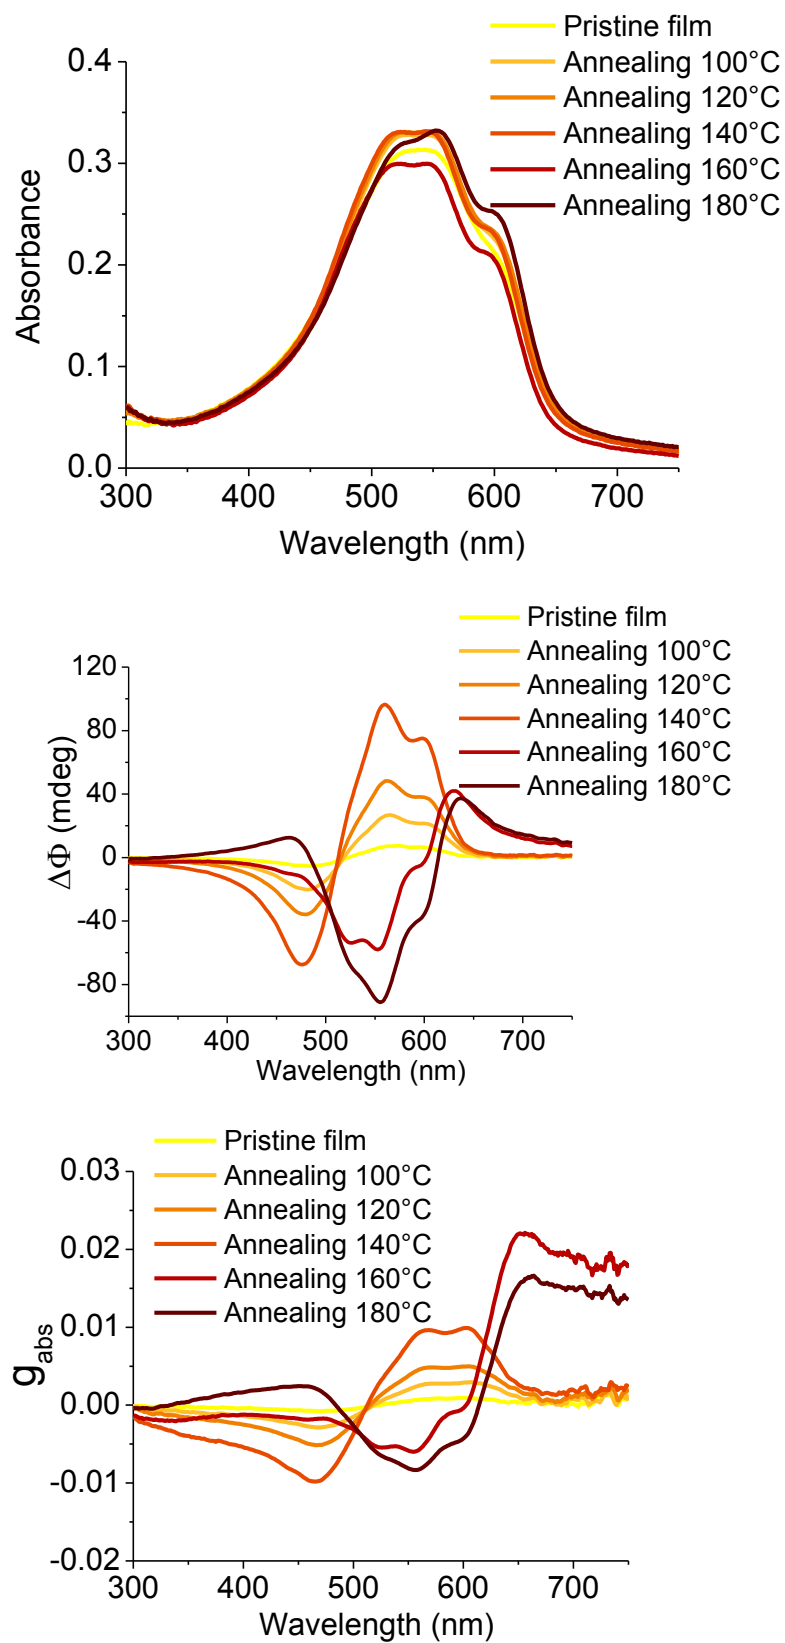



**Figure S31:** UV-vis, CD and  $g_{abs}$  spectra for the annealing experiments with **P4** with fast cooling.  
Each run, the film is annealed for 1 min at the temperature given in the legend and cooled fast at room T.

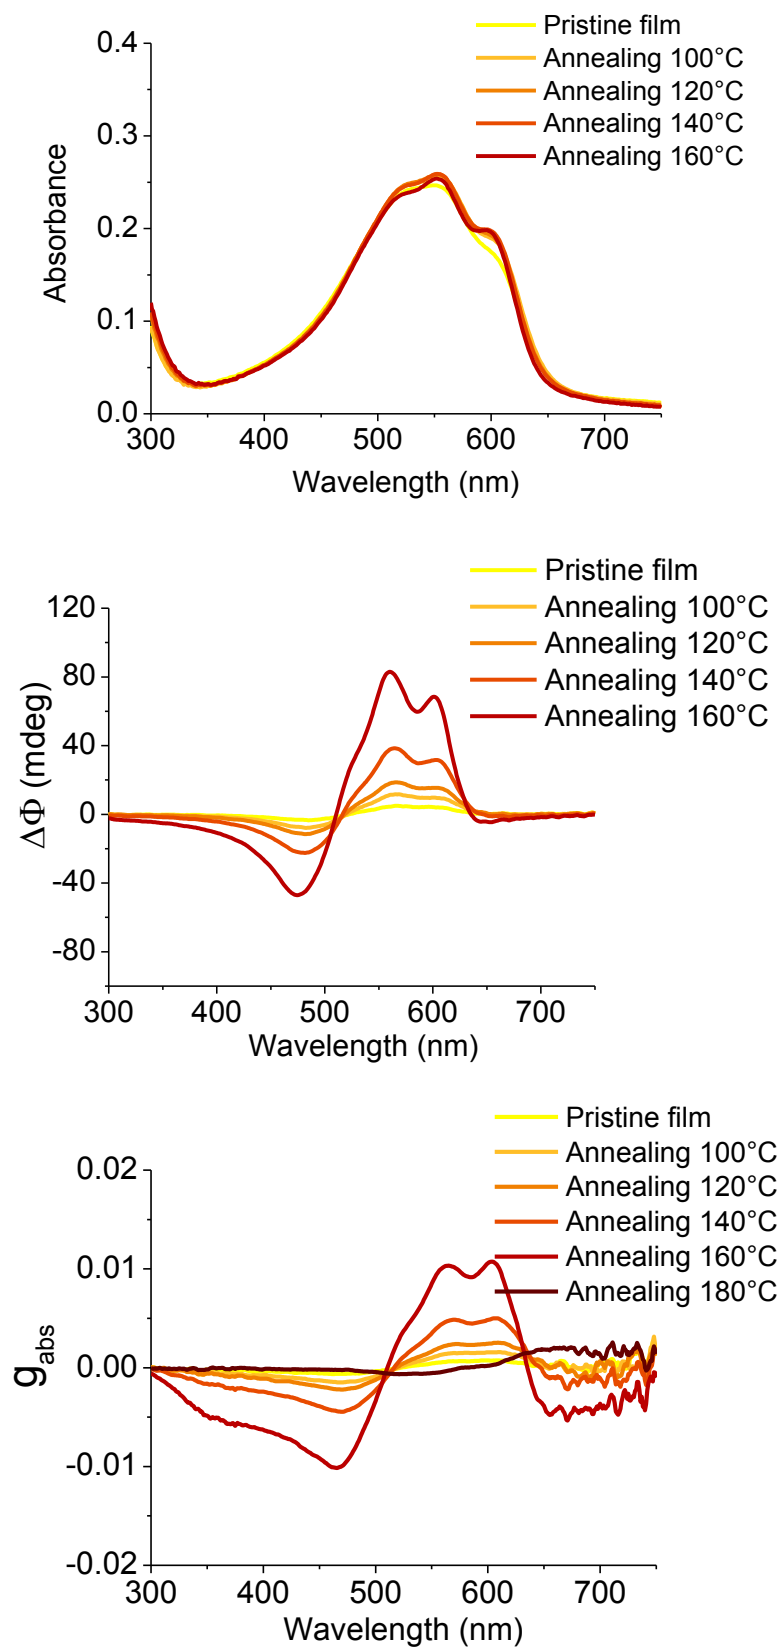

**Figure S32:** UV-vis, CD and  $g_{abs}$  spectra for the annealing experiments with **P4** with slow cooling.  
Each run, the film is annealed for 1 min at the temperature given in the legend and cooled slow at  $2\text{ }^{\circ}\text{C min}^{-1}$ .

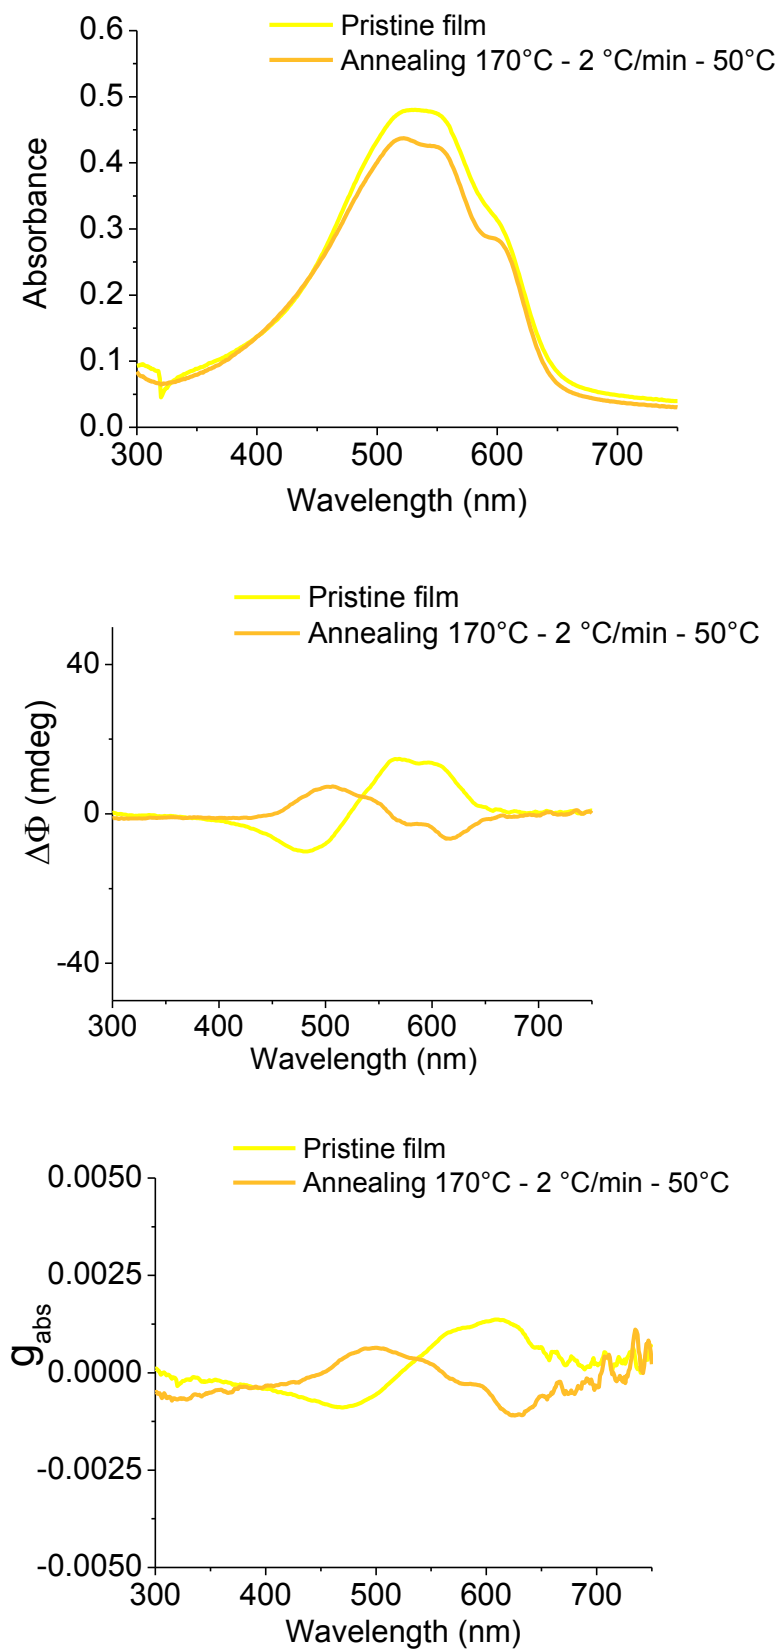

**Figure S33:** UV-vis, CD and  $g_{abs}$  spectra for the annealing experiments with **P5** with fast cooling.  
Each run, the film is annealed for 1 min at the temperature given in the legend and cooled fast at room T.

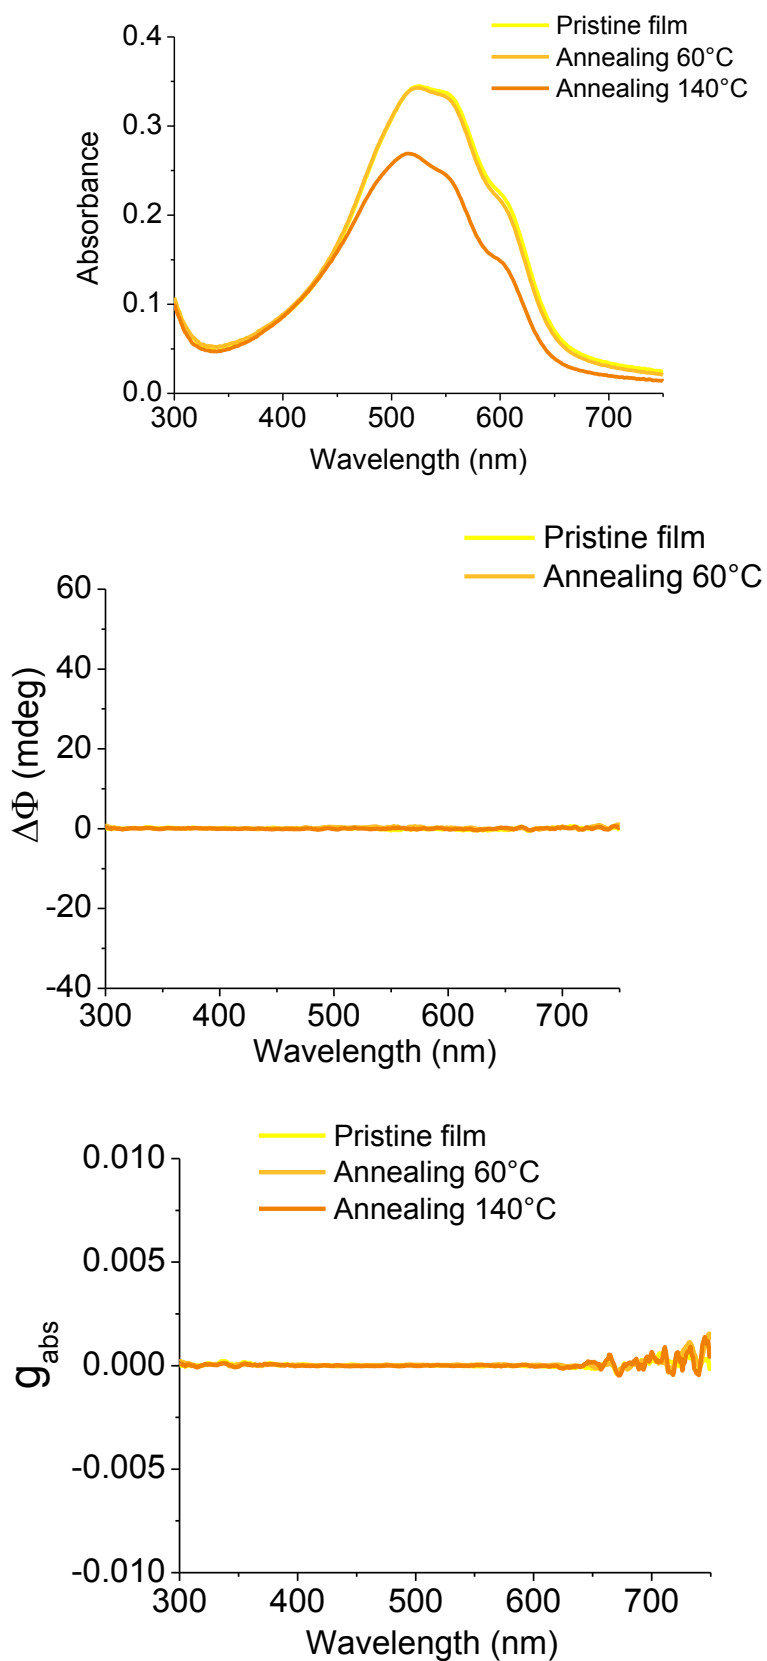

**Figure S34:** UV-vis, CD and  $g_{abs}$  spectra for the annealing experiments with **P6** with fast cooling. Each run, the film is annealed for 1 min at the temperature given in the legend and cooled fast at room T.

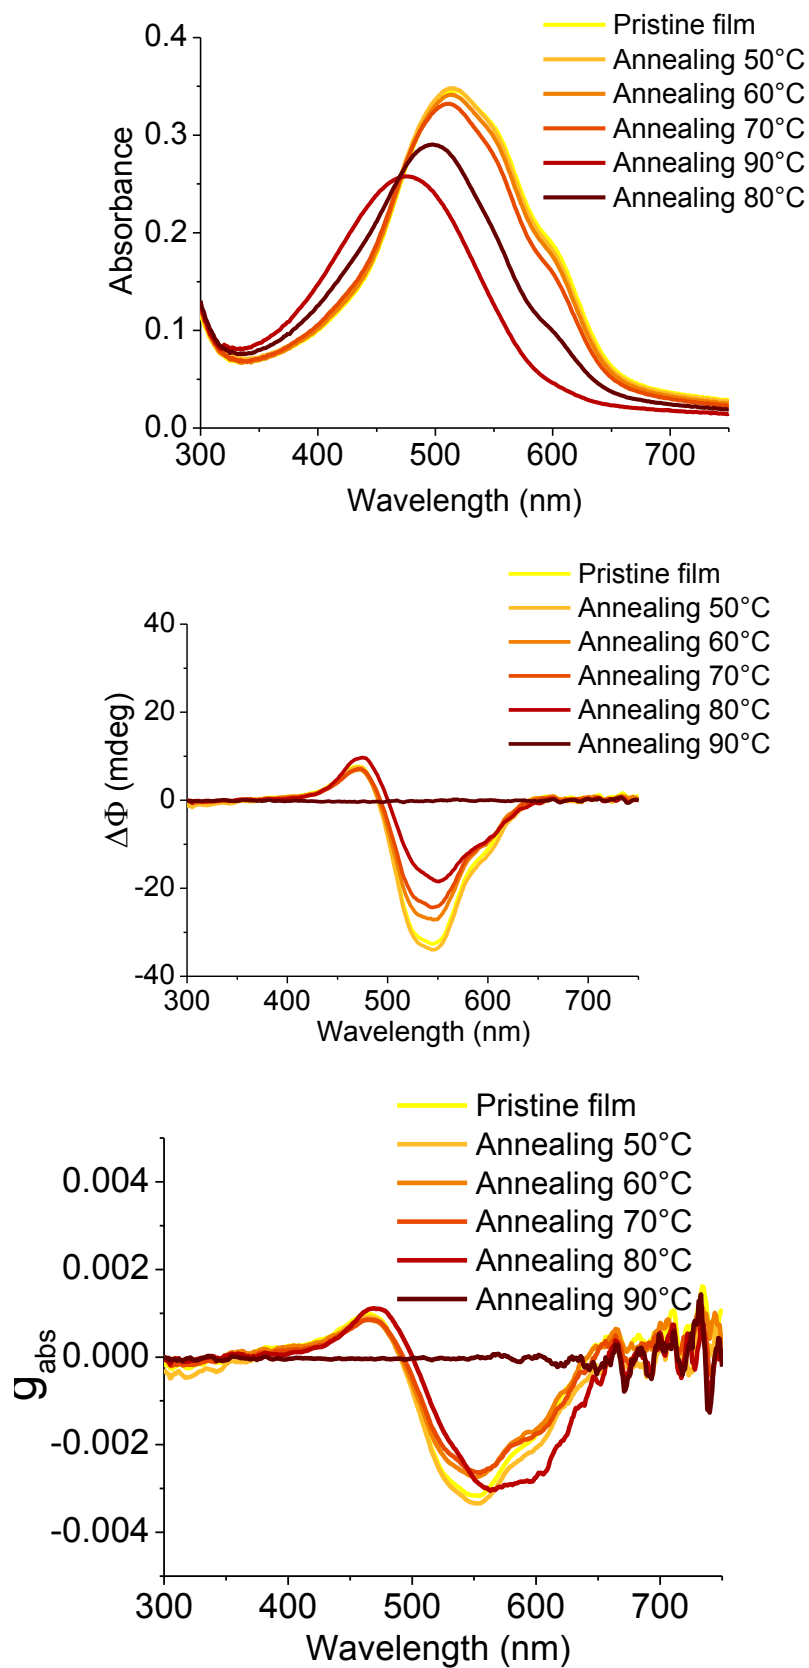

**Figure S35:** UV-vis, CD and  $g_{abs}$  spectra for the annealing experiments with **P6** with slow cooling.  
Each run, the film is annealed for 1 min at the temperature given in the legend and cooled slow at  $2\text{ }^{\circ}\text{C min}^{-1}$ .

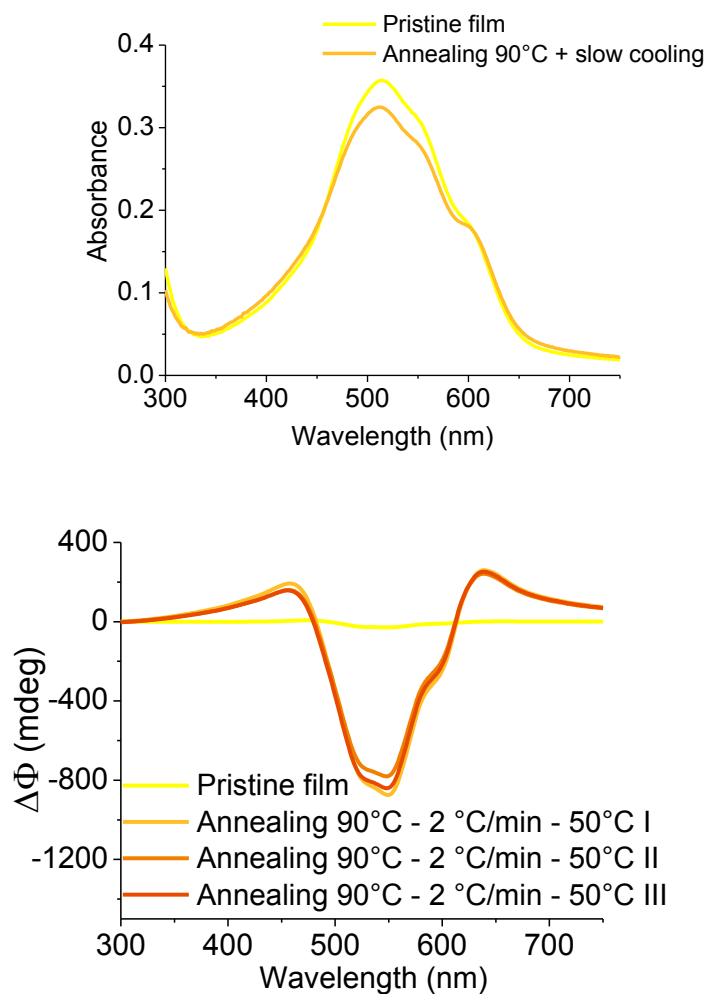

*I, II an III holds different measurements of the same film but under different angles. .*

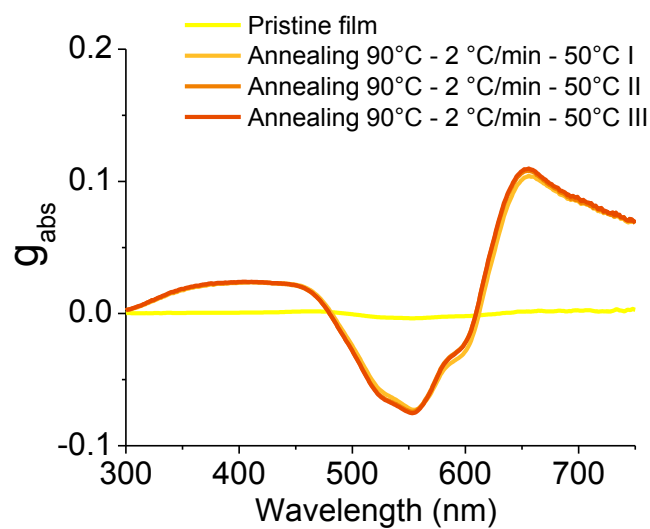

ii. *Spincoated from acidic media*

**Figure S36:** UV-vis, CD and  $g_{\text{abs}}$  spectra for the annealing experiments with **P2** with fast cooling.

Each run, the film is annealed for 1 min at the temperature given in the legend and cooled fast at room T.

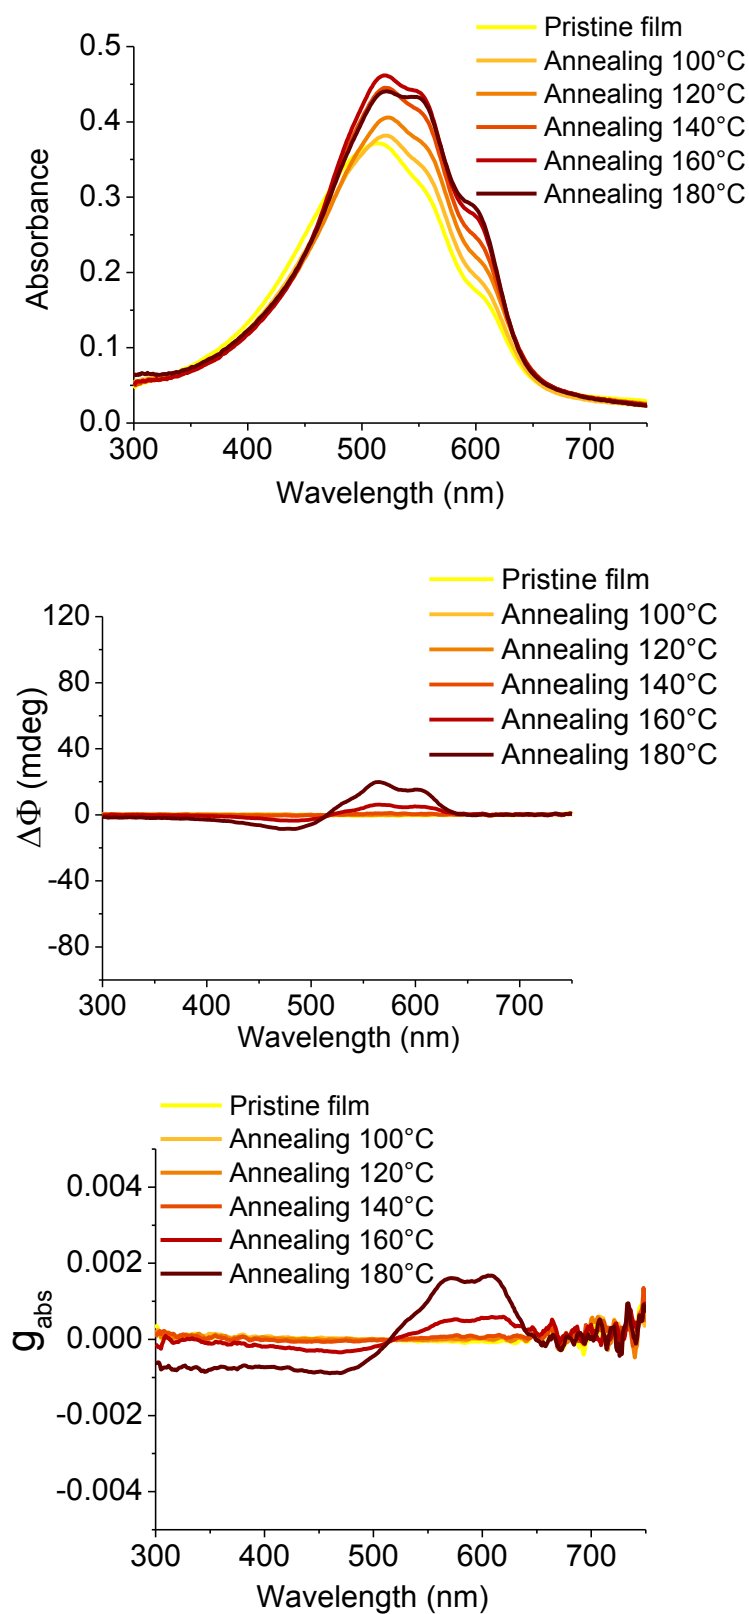

**Figure S37:** UV-vis, CD and  $g_{\text{abs}}$  spectra for the annealing experiments with **P3** with fast cooling.  
Each run, the film is annealed for 1 min at the temperature given in the legend and cooled fast at room T.

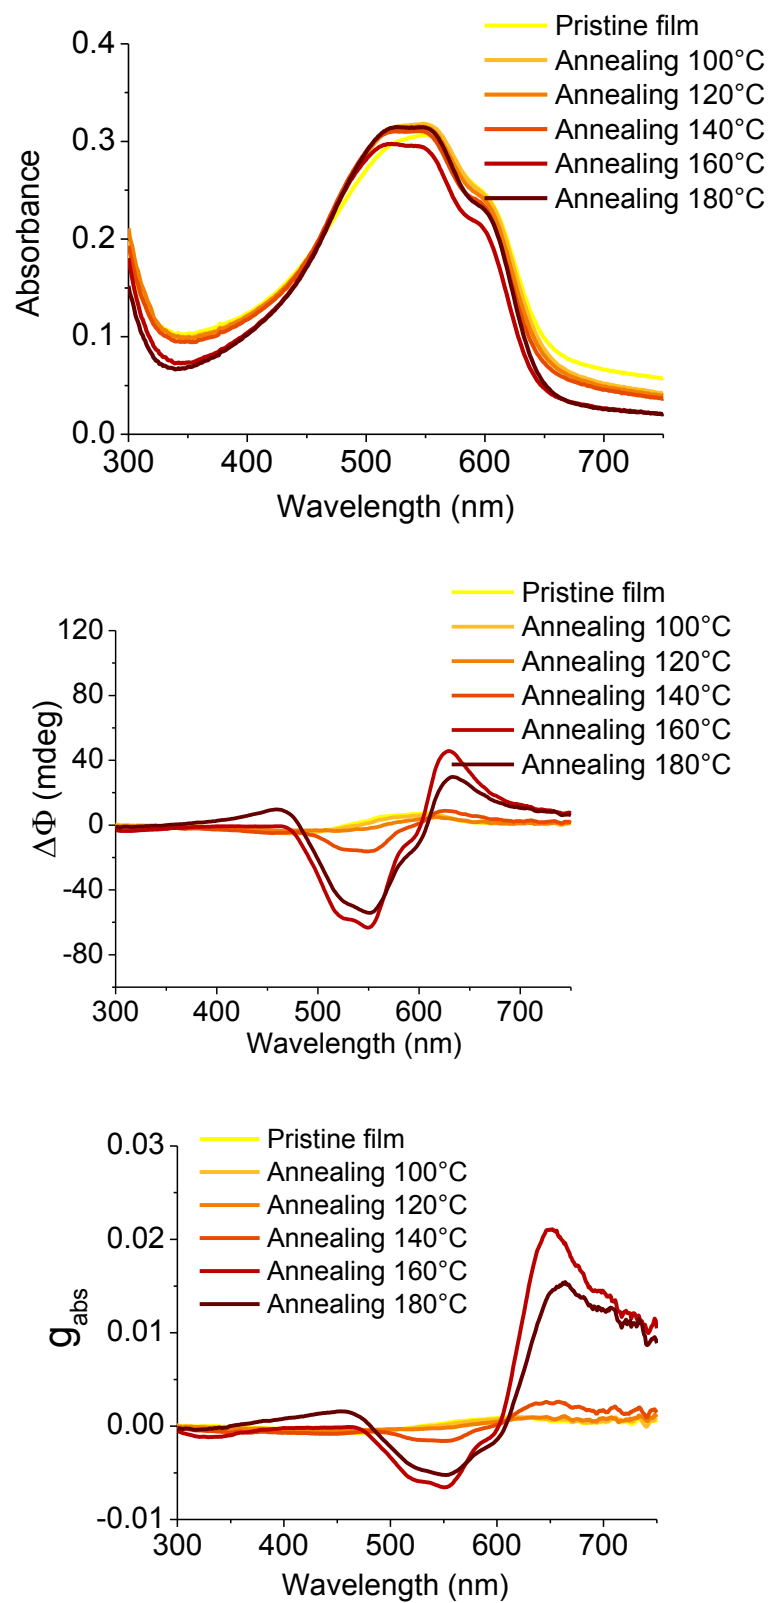

**Figure S38:** UV-vis, CD and  $g_{abs}$  spectra for the annealing experiments with **P4** with fast cooling.

Each run, the film is annealed for 1 min at the temperature given in the legend and cooled fast at room T.

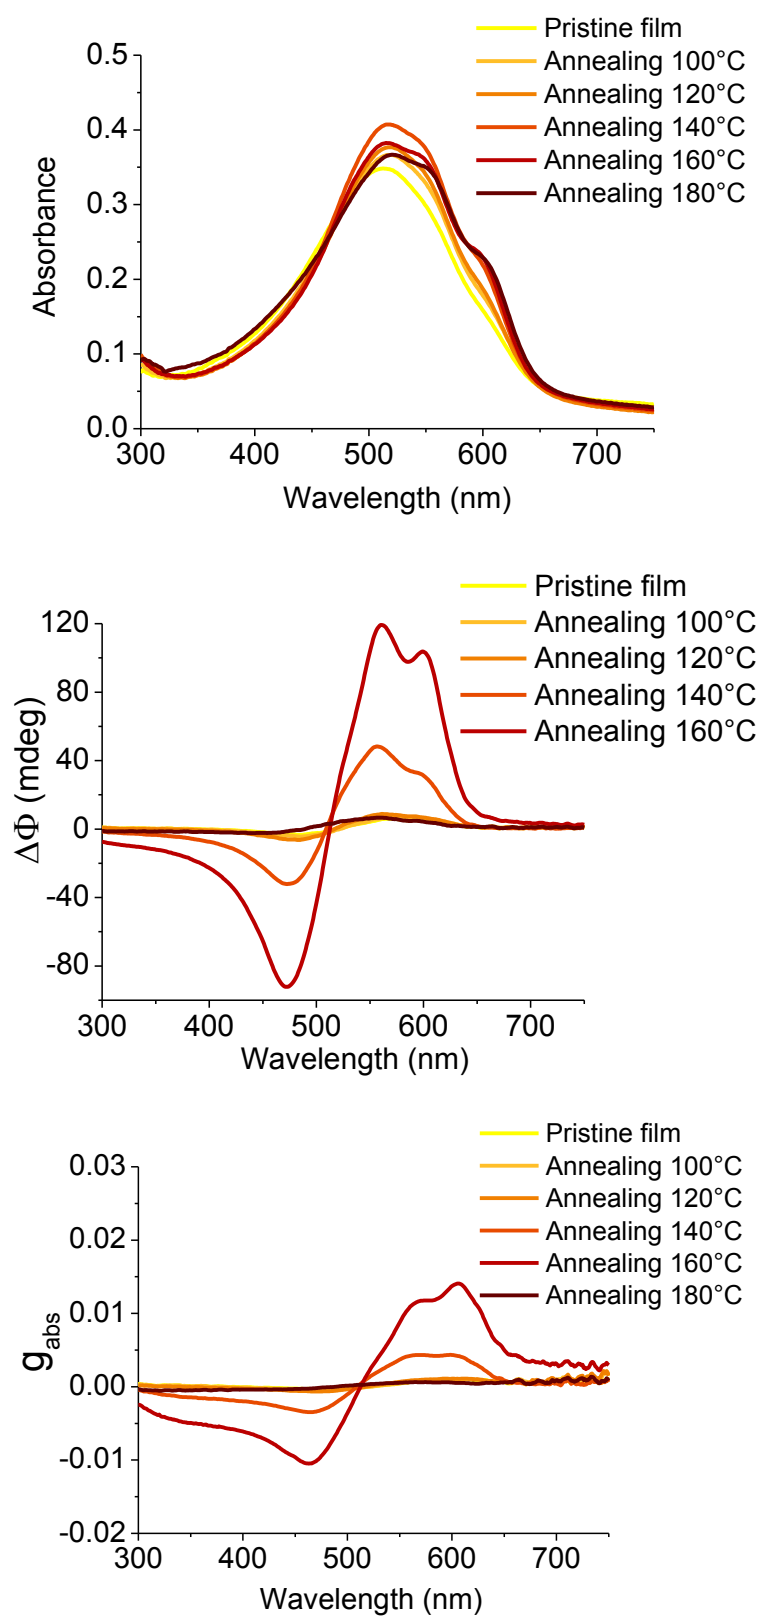



**Figure S39:** UV-vis, CD and  $g_{abs}$  spectra for the annealing experiments with **P6** with fast cooling.  
Each run, the film is annealed for 1 min at the temperature given in the legend and cooled fast at room T.

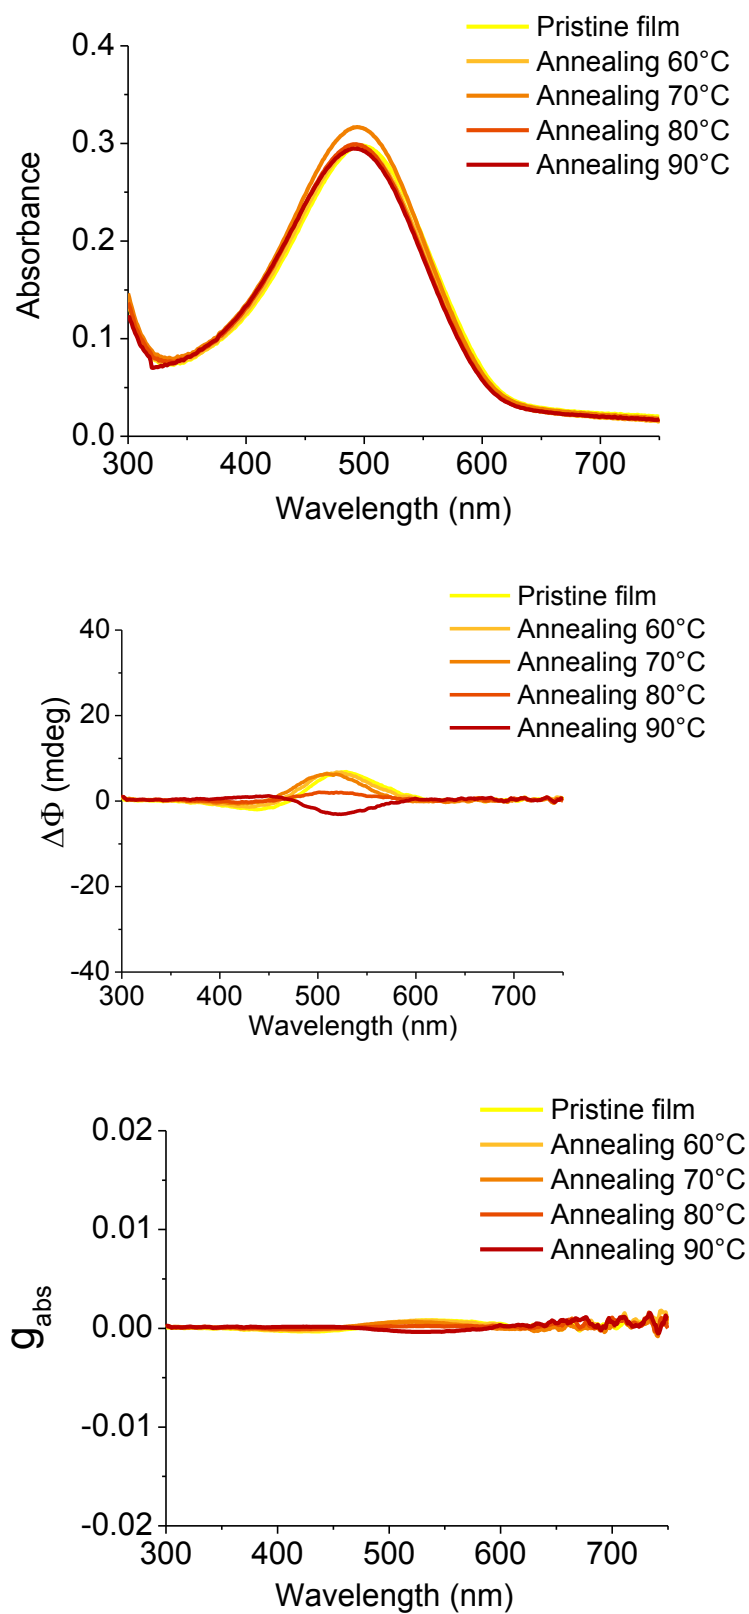

**Figure S40:** UV-vis, CD and  $g_{abs}$  spectra for the annealing experiments with **P6** with slow cooling.  
Each run, the film is annealed for 1 min at the temperature given in the legend and cooled slow at  $2\text{ }^{\circ}\text{C min}^{-1}$ .

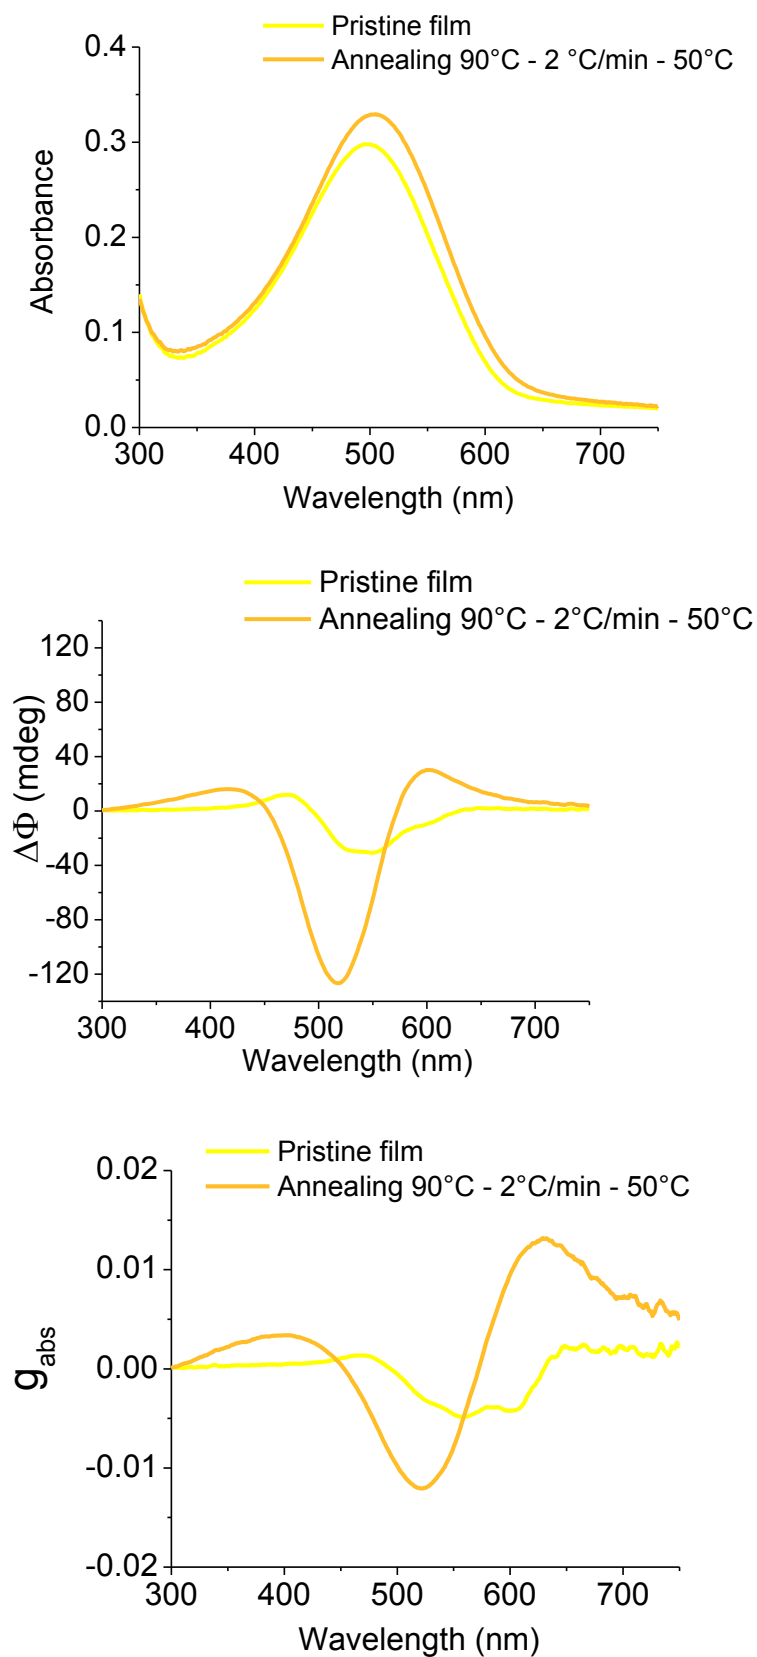

**Figure S41:** UV-vis, CD and  $g_{abs}$  spectra for the spincoated films of **P6** with different film thicknesses. The concentration of the solution in mg/ml used for spincoating is given at the end of the label in the legend.

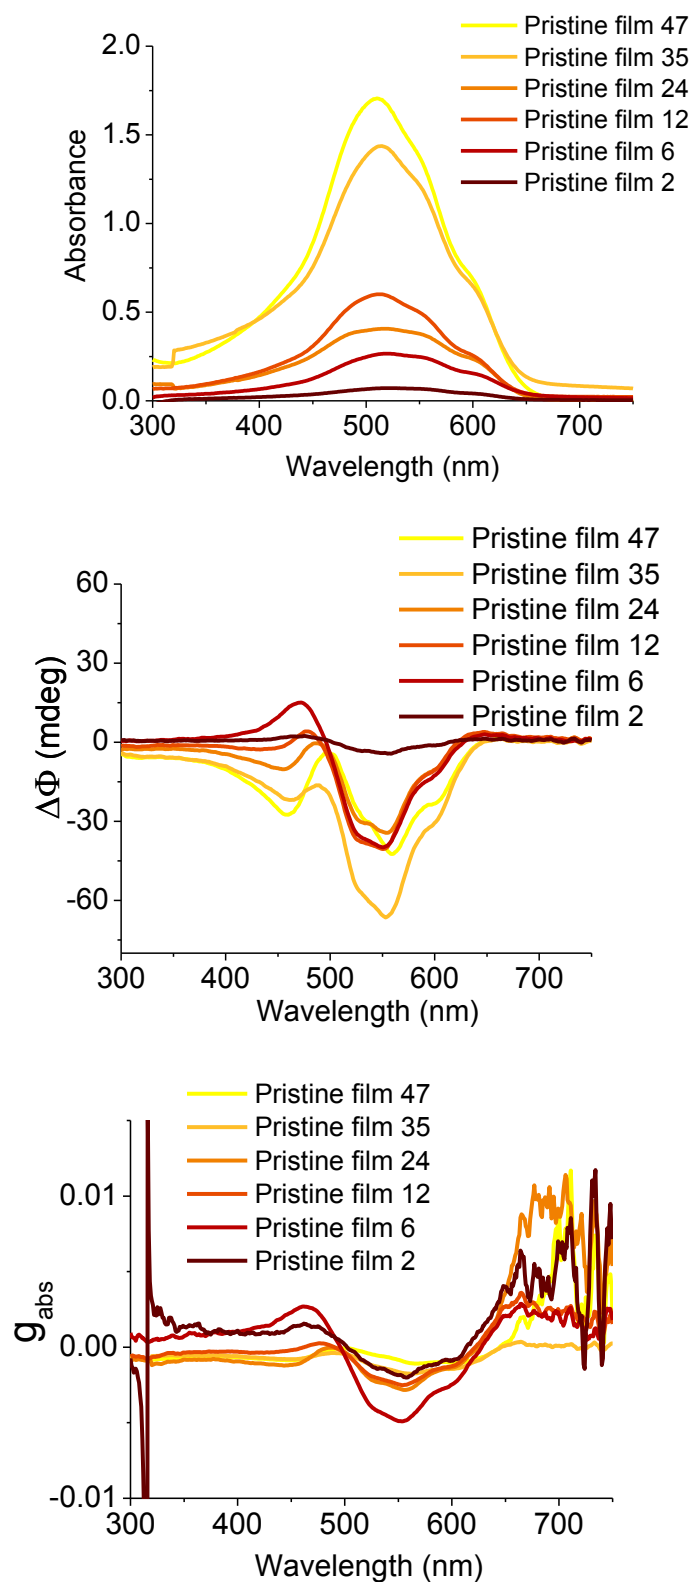

**Figure S42:** UV-vis, CD and  $g_{abs}$  spectra for the annealing experiments with **P6** with different film thicknesses and fast cooling.

Each run, the film is annealed for 1 min at the temperature given in the legend and cooled fast at room T. The concentration of the solution in mg/ml used for spincoating is given at the end of the label in the legend.

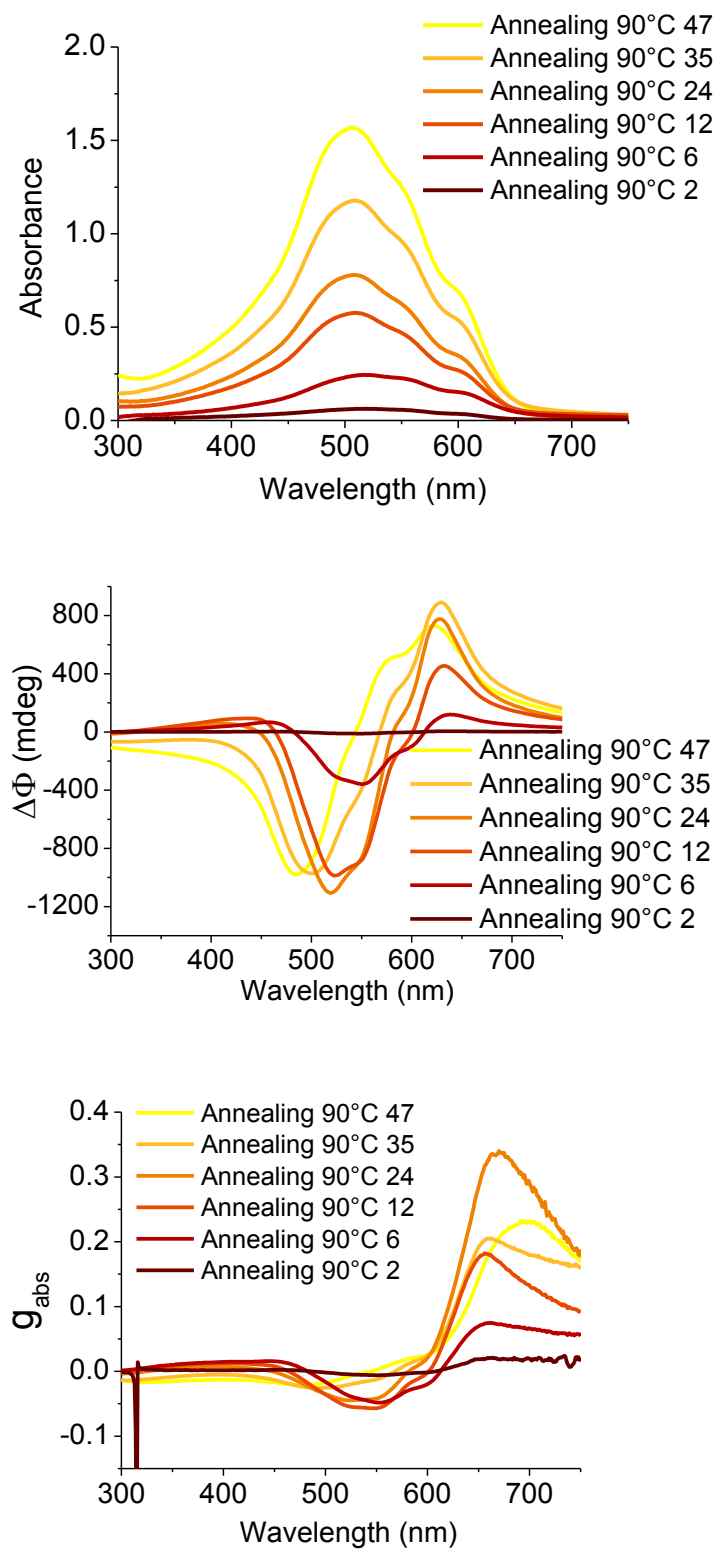

**Figure S43:** UV-vis, CD and  $g_{abs}$  spectra for the annealing experiments with **P6** with different film thicknesses and slow cooling.

Each run, the film is annealed for 1 min at the temperature given in the legend and cooled slow at  $2\text{ }^{\circ}\text{C min}^{-1}$ . The concentration of the solution in mg/ml used for spincoating is given at the end of the label in the legend.

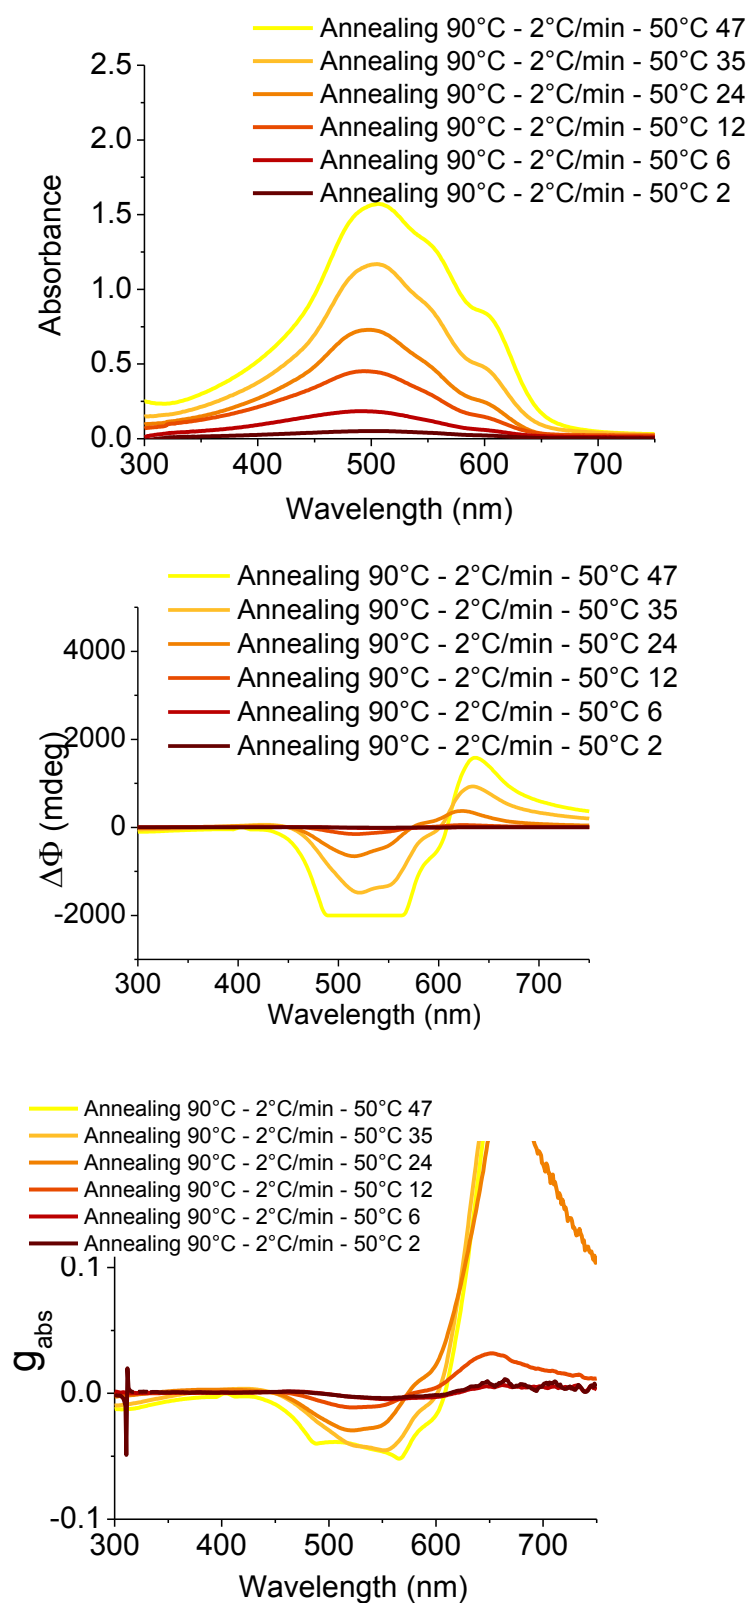

**C. Polarizing optical microscopy (POM)**

**Figure S44:** POM picture of the **P6** polymer sample during slow cooling from 90 °C.

The picture of the defect texture was taken at 68 °C (100 × magnification).

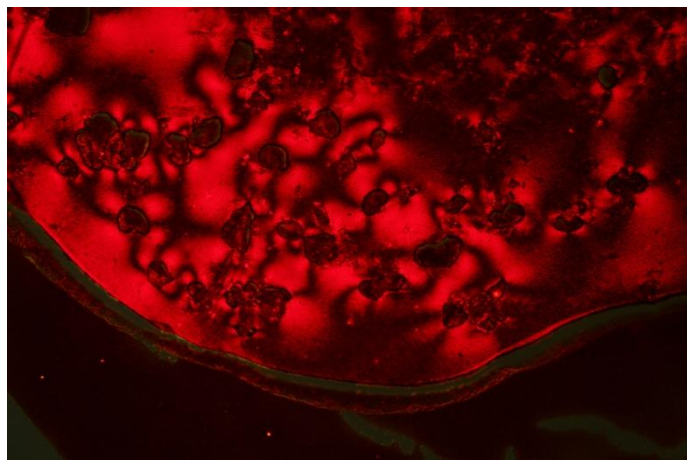

#### D. Differential scanning calorimetry (DSC) of polymers P1-P6

The polymers were first heated well above their melting temperature, kept at this temperature for 15 minutes and then slowly cooled down at  $2^{\circ}\text{C min}^{-1}$ . Finally, the melting temperatures were also determined by reheating the samples at  $10^{\circ}\text{C min}^{-1}$ .

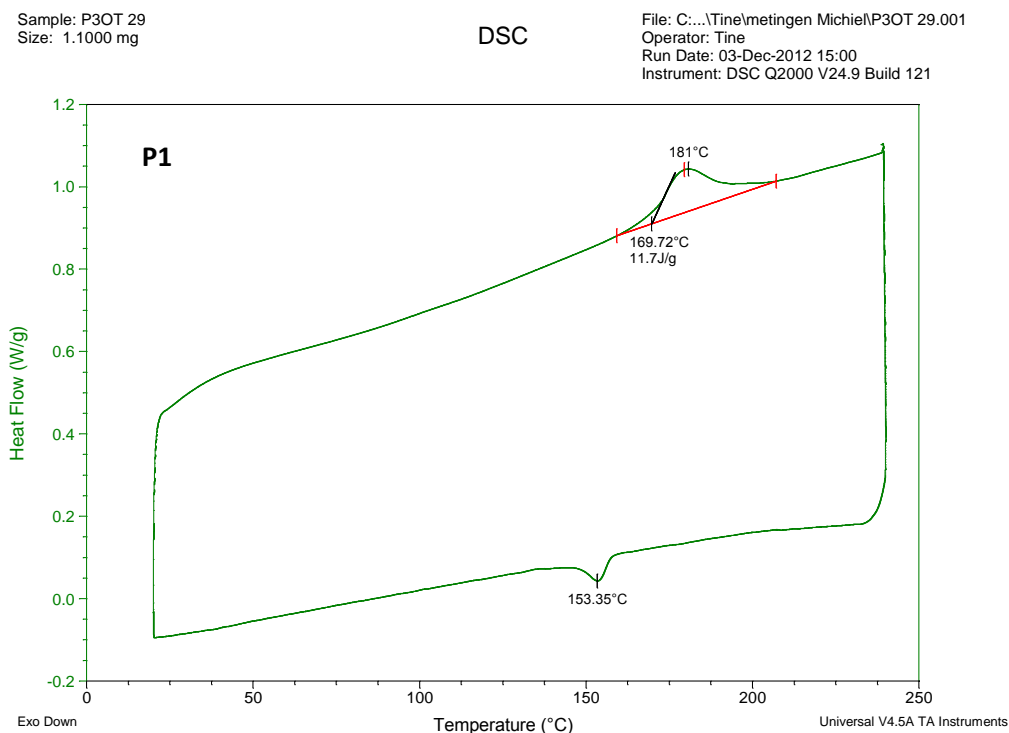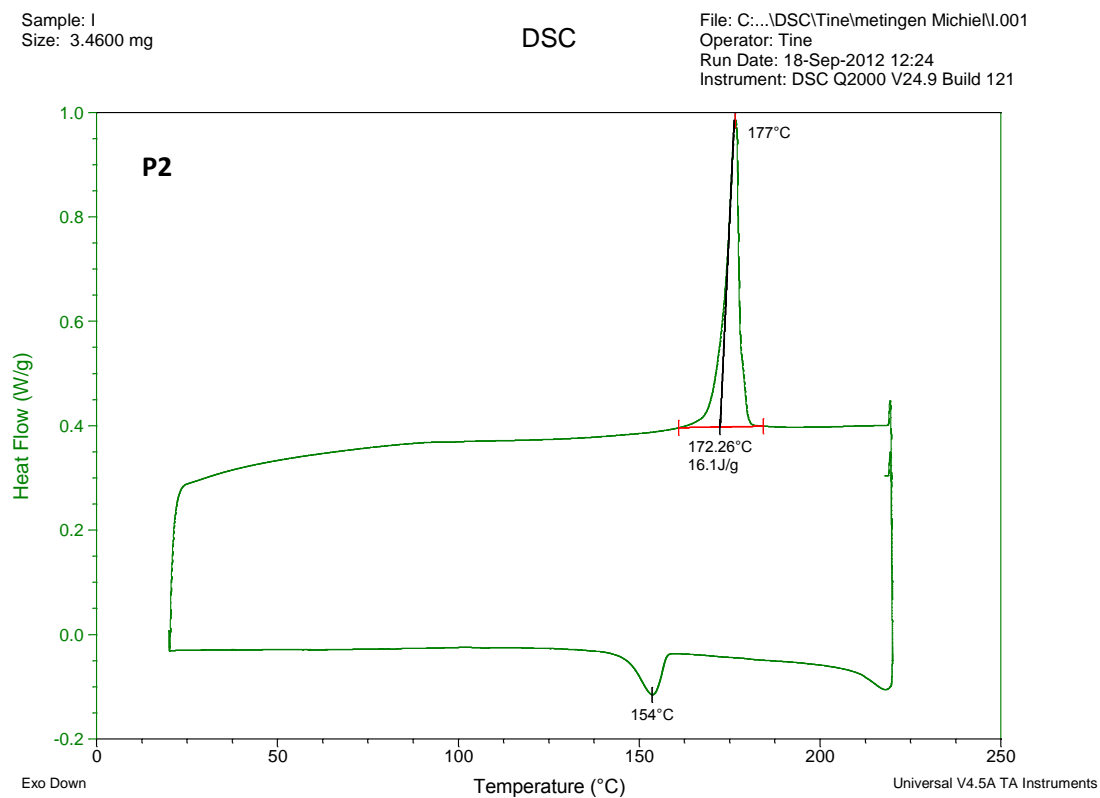

Sample: P3OT20-co-P3OT18  
Size: 3.4500 mg

DSC

File: C:\...\P3OT20-co-P3OT18.001  
Operator: Tine  
Run Date: 03-Dec-2012 18:29  
Instrument: DSC Q2000 V24.9 Build 121

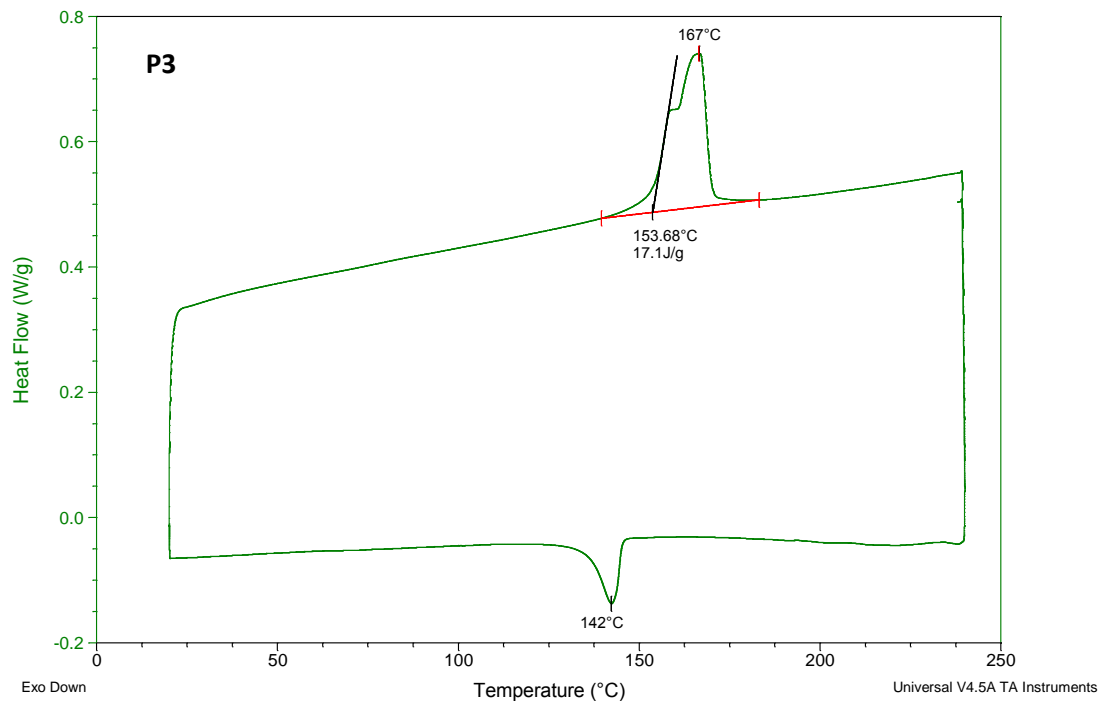

Sample: II  
Size: 4.5400 mg

DSC

File: C:\...DSC\Tine\metingen Michiel\II.001  
Operator: Tine  
Run Date: 18-Sep-2012 15:29  
Instrument: DSC Q2000 V24.9 Build 121

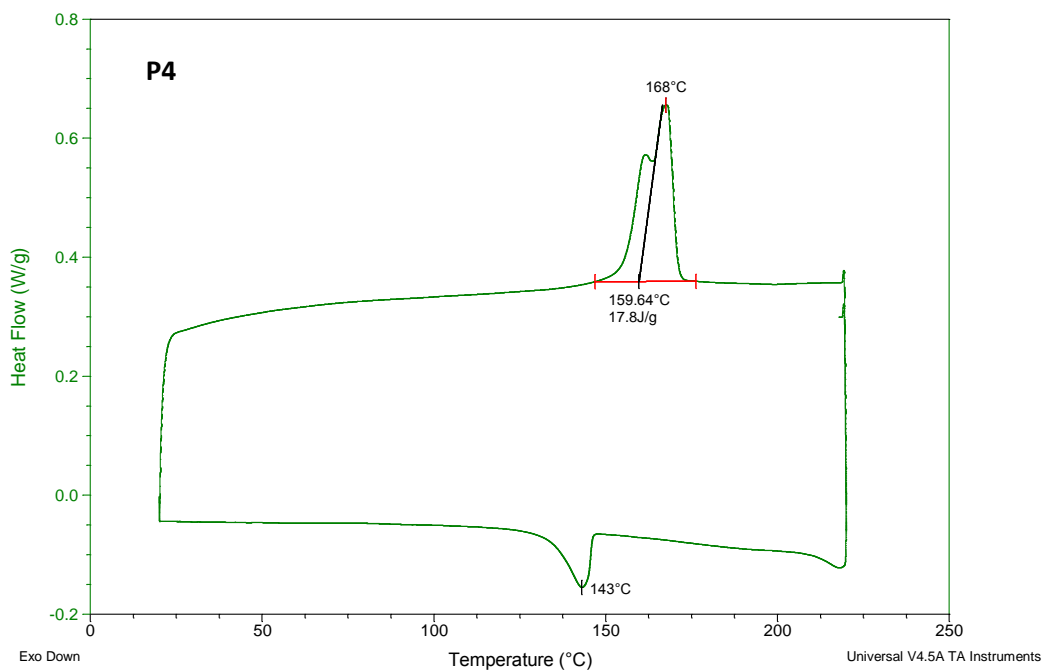



Sample: C8N  
Size: 2.4900 mg

DSC

File: C:\...metingen Michiel\C8N tot 180.001  
Operator: Tine  
Run Date: 01-Oct-2012 18:38  
Instrument: DSC Q2000 V24.9 Build 121

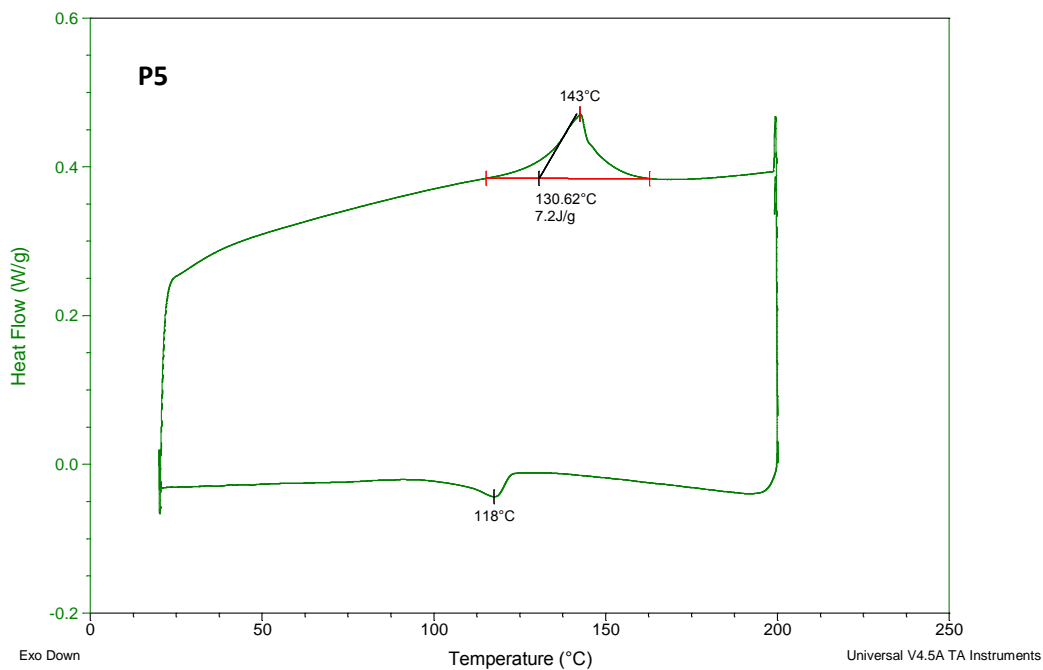

Sample: C10N  
Size: 3.2400 mg

DSC

File: C:\...metingen Michiel\C20N tot 180.001  
Operator: Tine  
Run Date: 01-Oct-2012 15:36  
Instrument: DSC Q2000 V24.9 Build 121

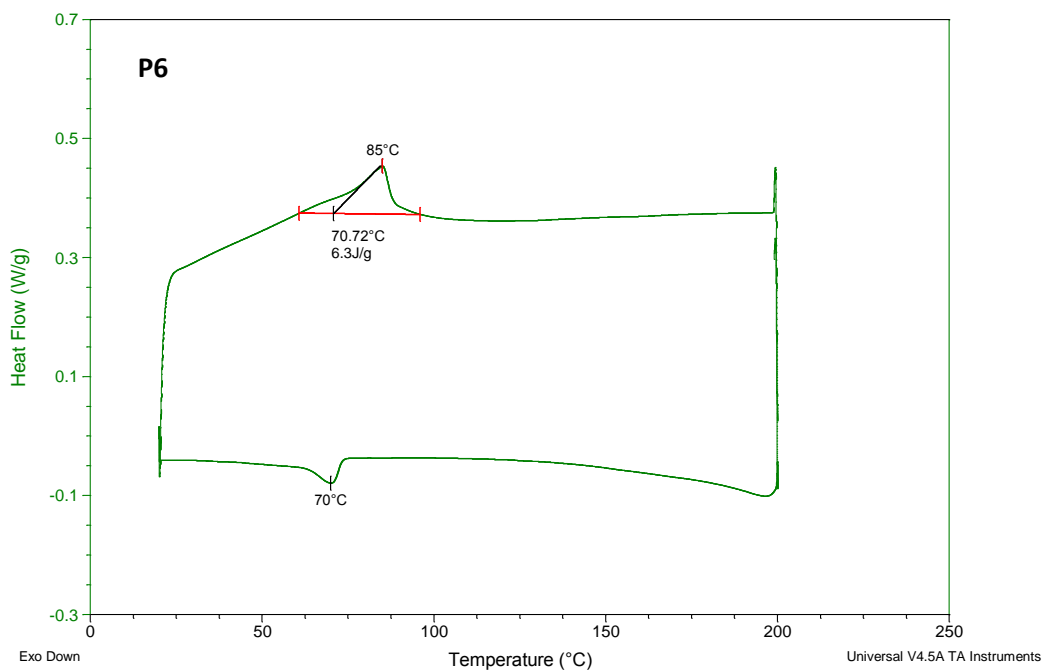

Supplement: c3py00133d.pdf [file c3py00133d.pdf]
